# Supplementary material for: Unbalanced Roles of Fungal Aggressiveness and Host Cultivars in the Establishment of the Fusarium Head Blight in Bread Wheat
Source: Front Microbiol. 2019 Dec 11;10:2857. doi: 10.3389/fmicb.2019.02857 (PMC6917580; doi:10.3389/fmicb.2019.02857)
Supplement: Supplementary file 1 [file Table_1.XLSX]

## Sheet: varexpl_symptom
Supplementary Table S1. Percentage of variance explained by "Strain", "Cultivar" and "Strain×Cultivar" For symptom severity, DON synthesis rate and fungal mass development monitoring.
Symptom monitoring
	Strain	Cultivar	Strain x Cultivar	Residual
24hpi	NA	NA	NA	NA
48hpi	42.79ns	38.46ns	4.14ns	14.61
72hpi	73.63*	5.83ns	8.25ns	12.29
96hpi	73.71*	13.66ns	8.06ns	4.57
120hpi	80.45*	8.99ns	4.22ns	6.34
144hpi	82.5*	9.7ns	2.83ns	4.97
168hpi	86.20*	5.89ns	3.54ns	4.37
Fungal mass monitoring
	Strain	Cultivar	Strain x Cultivar	Residual
72hpi	31.27*	1.41ns	18.49ns	48.83
168hpi	66.52*	5.8ns	12.31ns	15.37
DON synthesis rate monitoring
	Strain	Cultivar	Strain x Cultivar	Residual
72hpi	35.73*	19.29*	14.85ns	30.13
168hpi	34.74*	21.92*	12.52ns	24.18
*Indicate significant effect (p-value < 0.05). nsIndicate non significant effect.
