# Supplementary material for: Unbalanced Roles of Fungal Aggressiveness and Host Cultivars in the Establishment of the Fusarium Head Blight in Bread Wheat
Source: Front Microbiol. 2019 Dec 11;10:2857. doi: 10.3389/fmicb.2019.02857 (PMC6917580; doi:10.3389/fmicb.2019.02857)
Supplement: Supplementary file 2 [file Table_2.XLSX]

## Sheet: Sheet1
Supplementary Table S2: Table summarizing bioinformatics analyses of F. graminearum proteins identified in this experiment.
MDC_Fg1a	MDC_Fg13b	MDC_FgU01c	MDC_Fg1_accessions_according_to_Fabre_et_al._2019)d	FGDB_v32e	FGDB_v38f	Pathotypage_significantg	Grouph	Fabre et al. (2019)_significanti	Brown_secretomej	WolfPsort_fungik	WolfPsort_fungi_scorel	WolfPsort_plantm	WolfPsort_plant_scoren	EffectorP2_predictiono	EffectorP2_resultsp	PFAMq	Mutation_effectr	Mutated_pathogens	Hostt	DOIu
FG001_00002	FG013_08634	FU001_06965	FGSG_07480	FGSG_07480	FGRAMPH1_01T24913	Cluster 2	S	.	.	nucl	19.5	.	.	Non-effector	0.742	Ribosomal S3Ae family	.	.	.	.
FG001_00047	FG013_08589	.	fuGraFG1chr4G107800.1	FGSG_07439	FGRAMPH1_01T24825	Cluster 1	S+Cv	Cluster_5	.	extr	14	.	.	Effector	0.557	Cyclophilin type peptidyl-prolyl cis-trans isomerase/CLD	.	.	.	.
FG001_00114	FG013_08523	FU001_04893	fuGraFG1chr4G101500.1	FGSG_07380	FGRAMPH1_01T24679	Cluster 2	S	.	.	nucl	15	.	.	Non-effector	0.87	Septin	reduced virulence	Fusarium graminearum	Triticum aestivum	10.1016/j.fgb.2016.07.005
FG001_00138	FG013_07930	FU001_04868	fuGraFG1chr4G099200.1	FGSG_13136	FGRAMPH1_01T24629	.	.	.	.	mito	26.5	.	.	Non-effector	0.924	FAD binding domain	.	.	.	.
FG001_00175	FG013_07966	FU001_04831	FGSG_07335	FGSG_07335	FGRAMPH1_01T24551	.	.	.	.	cysk	27	.	.	Non-effector	0.771	Actin	.	.	.	.
FG001_00225 ; FG001_02815	FG013_08016 ; FG013_12041	FU001_04784 ; FU001_00381	fuGraFG1chr4G091200.1 ; fuGraFG1chr1G361200.1	FGSG_07291 ; FGSG_10527	FGRAMPH1_01T24441 ; FGRAMPH1_01T08335	Cluster 3	S+Cv	.	.	cyto_mito	10.166	.	.	Effector	0.566	Ribosomal protein S8	.	.	.	.
FG001_00340	FG013_07587	FU001_04664	fuGraFG1chr4G080200.1	FGSG_07186	FGRAMPH1_01T24179	.	.	.	.	mito	15	.	.	Non-effector	0.951	Ribosomal protein L4/L1 family	.	.	.	.
FG001_00508	FG013_06523	FU001_04115	fuGraFG1chr4G064900.1	FGSG_07048	FGRAMPH1_01T23825	Cluster 4	S	Cluster_1	.	mito	21	.	.	Non-effector	0.628	Ribosomal S13/S15 N-terminal domain	.	.	.	.
FG001_00572	FG013_06461	FU001_04056	fuGraFG1chr4G059200.1	FGSG_06993	FGRAMPH1_01T23695	Cluster 2	Cv	.	FGSG_06993	.	.	chlo	4	Non-effector	0.811	Protein of unknown function (DUF1524)	.	.	.	.
FG001_00614	FG013_06419	FU001_04015	FGSG_06955	FGSG_06955	FGRAMPH1_01T23595	.	.	.	.	cyto	19	.	.	Non-effector	0.772	Metallopeptidase family M24	.	.	.	.
FG001_00639	FG013_06395	FU001_03990	fuGraFG1chr4G051900.1	FGSG_16741	FGRAMPH1_01T23527	Cluster 5	S	.	.	cyto	19.5	.	.	Non-effector	0.807	pfkB family carbohydrate kinase	.	.	.	.
FG001_00640	FG013_06394	FU001_03989	fuGraFG1chr4G051800.1	FGSG_06931	FGRAMPH1_01T23525	Cluster 3	Cv	.	.	mito	12	.	.	Non-effector	0.744	Ribosomal Proteins L2, C-terminal domain	unaffected pathogenicity	Fusarium graminearum	Triticum aestivum	10.1371/journal.ppat.1002310
FG001_00649	FG013_06385	FU001_03980	fuGraFG1chr4G051000.1	FGSG_06924	FGRAMPH1_01T23507	Cluster 4	Cv	.	.	nucl	13.5	.	.	Effector	0.62	Ribosomal protein L1p/L10e family	.	.	.	.
FG001_00683	FG013_06352	FU001_03943	fuGraFG1chr4G047700.1	FGSG_06893	FGRAMPH1_01T23439	Cluster 2	S+Cv	.	.	mito	12	.	.	Non-effector	0.636	Ribosomal protein S13/S18	.	.	.	.
FG001_00741	FG013_06297	FU001_05821	fuGraFG1chr4G041800.1	FGSG_06847	FGRAMPH1_01T23321	Cluster 6	S+Cv	.	.	cyto_nucl	13	.	.	Non-effector	0.874	14-3-3_protein	.	.	.	.
FG001_00745	FG013_06293	FU001_05825	fuGraFG1chr4G041400.1	FGSG_06843	FGRAMPH1_01T23313	.	.	.	.	cyto	16.5	.	.	Non-effector	0.945	Initiation factor eIF2 gamma, C terminal	.	.	.	.
FG001_00748	FG013_06291	FU001_05827	fuGraFG1chr4G041200.1	FGSG_06841	FGRAMPH1_01T23309	Cluster 3	S	.	.	nucl	18.5	.	.	Non-effector	0.979	DEAD/DEAH box helicase	.	.	.	.
FG001_00761	FG013_06779	FU001_05840	fuGraFG1chr4G039700.1	FGSG_06827	FGRAMPH1_01T23279	Cluster 2	S	.	.	cyto	19.5	.	.	Non-effector	0.721	Ribosomal protein L10	.	.	.	.
FG001_00832	FG013_06706	FU001_05915	fuGraFG1chr4G032600.1	FGSG_06757	FGRAMPH1_01T23109	Cluster 5	S	.	.	mito	15	.	.	Unlikely effector	0.511	Ribosomal L37ae protein family	.	.	.	.
FG001_00898	FG013_06640	FU001_05986	fuGraFG1chr4G026300.1	FGSG_06702	FGRAMPH1_01T22955	Cluster 5	S	.	.	mito	14	.	.	Unlikely effector	0.544	Triosephosphate isomerase	.	.	.	.
FG001_00995	FG013_06544	FU001_07280	fuGraFG1chr4G017800.1	FGSG_06619	FGRAMPH1_01T22745	Cluster 5	S	.	.	pero	11.5	.	.	Non-effector	0.54	Alcohol dehydrogenase GroES-like domain	.	.	.	.
FG001_01009	FG013_13029	.	FGSG_06611	FGSG_06611	FGRAMPH1_01T22713	Cluster 2	S	Cluster_3	.	cyto	10.5	.	.	Non-effector	0.926	Tubulin/FtsZ family, GTPase domain	.	.	.	.
FG001_01041	FG013_11189	FU001_07241	fuGraFG1chr4G014400.1	FGSG_06587	FGRAMPH1_01T22651	Cluster 2	S+Cv	.	.	nucl	15.5	.	.	Non-effector	0.69	Ribosomal protein S7e	.	.	.	.
FG001_01165	FG013_09769	FU001_11870	fuGraFG1chr2G102400.1 ; fuGraFG1chr2G102500.1	FGSG_02781 ; FGSG_02782	FGRAMPH1_01T11299 ; FGRAMPH1_01T11301	Cluster 1	S+Cv	.	.	mito	26	.	.	Non-effector	0.989	Transketolase, pyrimidine binding domain	.	.	.	.
FG001_01387	FG013_07243	FU001_06799	fuGraFG1chr2G122000.1	FGSG_02974	FGRAMPH1_01T11747	.	.	.	.	cyto	12.5	.	.	Non-effector	0.95	Peroxidase	.	.	.	.
FG001_01770	FG013_09456	FU001_12121	fuGraFG1chr2G158100.1	FGSG_03315	FGRAMPH1_01T12585	Cluster 2	S	Cluster_1	FGSG_03315	.	.	chlo	7.5	Non-effector	0.918	Subtilase family	.	.	.	.
FG001_01942	FG013_10961	FU001_09665	fuGraFG1chr2G173800.1	FGSG_03466	FGRAMPH1_01T12947	Cluster 5	S	.	.	cyto	15.5	.	.	Non-effector	0.672	Aldo/keto reductase family	.	.	.	.
FG001_01943	FG013_10960	FU001_09664	fuGraFG1chr2G173900.1	FGSG_03467	FGRAMPH1_01T12949	Cluster 4	Cv	.	FGSG_03467	.	.	chlo	13	Non-effector	0.932	Fungalysin metallopeptidase (M36)	.	.	.	.
FG001_02017	FG013_05608	FU001_12562	fuGraFG1chr2G180400.1	FGSG_03535	FGRAMPH1_01T13107	.	.	.	.	cyto	12	.	.	Non-effector	0.99	Cytochrome P450	.	.	.	.
FG001_02023	FG013_05614	FU001_12568	fuGraFG1chr2G180900.1	FGSG_03543	FGRAMPH1_01T13123	Cluster 4	Cv	.	.	cyto	13	.	.	Non-effector	0.915	.	reduced virulence	Fusarium graminearum	Triticum aestivum	10.1021/jf051441a
FG001_02112	FG013_05704	FU001_00786	fuGraFG1chr2G189000.1	FGSG_03624	FGRAMPH1_01T13319	.	.	.	FGSG_03624	.	.	chlo	5	Effector	0.849	Glycosyl hydrolases family 11	induced necrosis in wheat tissus but not essential for virulence	Fusarium graminearum	Triticum aestivum	10.1016/j.plaphy.2012.12.008
FG001_02159	FG013_05751	FU001_00829	fuGraFG1chr2G193100.1	FGSG_03662	FGRAMPH1_01T13409	.	.	.	.	extr	23	.	.	Effector	0.78	.	.	.	.	.
FG001_02193	FG013_05787	FU001_00862	fuGraFG1chr2G196900.1	FGSG_03695	FGRAMPH1_01T13483	.	.	Cluster_5	FGSG_03695	.	.	cyto	7	Effector	0.767	Glycosyl hydrolase family 61	unaffected pathogenicity	Fusarium graminearum	Triticum aestivum	10.1371/journal.ppat.1002310
FG001_02224	FG013_06879	.	fuGraFG1chr1G303100.1	FGSG_09998	FGRAMPH1_01T07031	.	.	.	.	cyto	18	.	.	Non-effector	0.99	Transketolase, thiamine diphosphate binding domain	.	.	.	.
FG001_02237	FG013_06866	FU001_09225	FGSG_10010	FGSG_10010	FGRAMPH1_01T07071	Cluster 3	S+Cv	.	.	nucl	19	.	.	Non-effector	0.705	Ribosomal large subunit proteins 60S L5, and 50S L18	.	.	.	.
FG001_02243	FG013_06860	FU001_09231	fuGraFG1chr1G305100.1	FGSG_10016	FGRAMPH1_01T07083	.	.	.	.	nucl	19.5	.	.	Non-effector	0.968	SAM domain (Sterile alpha motif)	.	.	.	.
FG001_02357	FG013_06030	FU001_11554	fuGraFG1chr1G316600.1	FGSG_10118	FGRAMPH1_01T07331	.	.	.	.	mito	27	.	.	Non-effector	0.752	Acetohydroxy acid isomeroreductase, NADPH-binding domain	.	.	.	.
FG001_02421	FG013_06095	FU001_11615	fuGraFG1chr1G322600.1	FGSG_10177	FGRAMPH1_01T07463	Cluster 2	S	Cluster_5	.	cyto	21	.	.	Effector	0.904	Glutathione-dependent formaldehyde-activating enzyme	.	.	.	.
FG001_02447	FG013_06122	FU001_00017	fuGraFG1chr1G325600.1	FGSG_10200	FGRAMPH1_01T07527	Cluster 1	S+Cv	.	.	cyto	27	.	.	Non-effector	0.501	Alcohol dehydrogenase GroES-like domain	.	.	.	.
FG001_02497	FG013_06170	FU001_00067	fuGraFG1chr1G330800.1	FGSG_10245	FGRAMPH1_01T07633	Cluster 2	S+Cv	.	.	mito	17	.	.	Effector	0.635	Ribosomal protein L7Ae/L30e/S12e/Gadd45 family	.	.	.	.
FG001_02498	FG013_06171	FU001_00068	fuGraFG1chr1G330900.1	FGSG_10246	FGRAMPH1_01T07635	Cluster 2	S+Cv	.	.	nucl	13.5	.	.	Non-effector	0.818	Ribosomal protein L16p/L10e	.	.	.	.
FG001_02502	FG013_06175	FU001_00073	fuGraFG1chr1G331400.1	FGSG_17334	FGRAMPH1_01T07645	.	.	Cluster_2	.	cyto	18.5	.	.	Non-effector	0.755	Spermine/spermidine synthase domain	.	.	.	.
FG001_02545	FG013_06218	FU001_00116	fuGraFG1chr1G334900.1	FGSG_17337	FGRAMPH1_01T07731	Cluster 2	S	.	.	cysk	22	.	.	Non-effector	0.967	Acyl-CoA dehydrogenase, C-terminal domain	.	.	.	.
FG001_02611	FG013_06283	FU001_00178	fuGraFG1chr1G341600.1	FGSG_10347	FGRAMPH1_01T07881	.	.	.	.	mito	20	.	.	Non-effector	0.862	Isocitrate/isopropylmalate dehydrogenase	.	.	.	.
FG001_03132	FG013_08766	FU001_08293	fuGraFG1chr2G262300.1	FGSG_04315	FGRAMPH1_01T14989	.	.	.	.	mito	18.5	.	.	Effector	0.651	Cytochrome c oxidase subunit IV	.	.	.	.
FG001_03136	FG013_08762	FU001_08290	fuGraFG1chr2G262000.1	FGSG_04312	FGRAMPH1_01T14983	.	.	.	.	mito	25	.	.	Non-effector	0.982	ATP synthase alpha/beta family, nucleotide-binding domain	.	.	.	.
FG001_03219	FG013_08680	FU001_08205	fuGraFG1chr2G254100.1	FGSG_04232	FGRAMPH1_01T14799	.	.	.	.	cyto	23	.	.	Non-effector	0.949	UDP-glucose/GDP-mannose dehydrogenase family, NAD binding domain	.	.	.	.
FG001_03278	FG013_12175	FU001_08149	FGSG_04181	FGSG_04181	FGRAMPH1_01T14675	.	.	.	.	cyto_nucl	14	.	.	Non-effector	0.956	ABC transporter	.	.	.	.
FG001_03288	FG013_05267	FU001_08139	FGSG_04171	FGSG_04171	FGRAMPH1_01T14655	Cluster 3	S	.	.	mito	23.5	.	.	Non-effector	0.929	2-oxoacid dehydrogenases acyltransferase (catalytic domain)	.	.	.	.
FG001_03327	FG013_05305	FU001_08681	fuGraFG1chr2G244300.1	FGSG_04136	FGRAMPH1_01T14577	Cluster 2	S	Cluster_1	.	mito	18	.	.	Effector	0.68	Ribosomal protein S9/S16	.	.	.	.
FG001_03483	FG013_05465	FU001_01183	fuGraFG1chr2G228600.1	FGSG_03992	FGRAMPH1_01T14205	Cluster 2	S+Cv	.	.	cyto	26.5	.	.	Non-effector	0.649	Phosphoglycerate kinase	.	.	.	.
FG001_03654	FG013_05957	FU001_01015	fuGraFG1chr2G213400.1	FGSG_03842	FGRAMPH1_01T13837	Cluster 1	Cv	.	FGSG_03842	.	.	chlo	11	Non-effector	0.726	Alpha amylase, catalytic domain	.	.	.	.
FG001_03839	FG013_00178	FU001_07984	fuGraFG1chr3G076400.1	FGSG_05433	FGRAMPH1_01T17903	.	.	.	.	mito	19	.	.	Unlikely effector	0.521	Ribosomal protein S3, C-terminal domain	.	.	.	.
FG001_03845	FG013_00184	FU001_07990	fuGraFG1chr3G075900.1	FGSG_05428	FGRAMPH1_01T17893	Cluster 2	S+Cv	.	.	cyto	10	.	.	Non-effector	0.682	eIF-6 family	.	.	.	.
FG001_04167	FG013_00505	FU001_12447	fuGraFG1chr3G046700.1	FGSG_05140	FGRAMPH1_01T17197	Cluster 1	S	.	.	mito	12	.	.	Non-effector	0.865	Acyl-CoA dehydrogenase, C-terminal domain	.	.	.	.
FG001_04284	FG013_00623	FU001_07661	fuGraFG1chr3G035800.1 ; fuGraFG1chr3G035900.1	FGSG_12669 ; FGSG_17641	FGRAMPH1_01T16927 ; FGRAMPH1_01T16929	.	.	.	.	cyto	19	.	.	Non-effector	0.989	Pyridoxal-phosphate dependent enzyme	.	.	.	.
FG001_04401	FG013_00740	FU001_07550	fuGraFG1chr3G025100.1	FGSG_04936	FGRAMPH1_01T16679	Cluster 3	Cv	.	.	cyto	10	.	.	Non-effector	0.814	Peptidase family M28	.	.	.	.
FG001_04526	FG013_02961	FU001_02989	fuGraFG1chr3G203600.1	FGSG_10905	FGRAMPH1_01T20767	Cluster 2	S	Cluster_1	.	cyto	17.5	.	.	Non-effector	0.92	Ribosomal protein S2	.	.	.	.
FG001_04572	FG013_02920	FU001_02950	fuGraFG1chr3G207700.1	FGSG_10941	FGRAMPH1_01T20853	.	.	.	.	nucl	17	.	.	Non-effector	0.553	Ubiquitin family	.	.	.	.
FG001_04602	FG013_02886	FU001_02915	fuGraFG1chr3G210300.1 ; fuGraFG1chr3G210400.1	FGSG_10974 ; FGSG_10975	FGRAMPH1_01T20923 ; FGRAMPH1_01T20925	Cluster 5	S	.	.	cyto	16.5	.	.	Effector	0.585	Domain of unknown function (DUF1993)	.	.	.	.
FG001_04657	FG013_02827	FU001_02863	FGSG_11026	FGSG_11026	FGRAMPH1_01T21053	.	.	.	.	nucl	8.5	.	.	Non-effector	0.991	AMP-binding enzyme	.	.	.	.
FG001_04810	FG013_08485	FU001_11171	fuGraFG1chr3G230400.1	FGSG_11164	FGRAMPH1_01T21371	Cluster 2	S+Cv	Cluster_5	FGSG_11164	.	.	chlo	11	Non-effector	0.965	Trypsin	.	.	.	.
FG001_04917	FG013_08375	FU001_12794	FGSG_11249	FGSG_11249	FGRAMPH1_01T21605	.	.	.	FGSG_11249	.	.	chlo	13	Non-effector	0.714	Zinc carboxypeptidase	.	.	.	.
FG001_04976	FG013_08321	FU001_05732	FGSG_11304	FGSG_11304	FGRAMPH1_01T21737	Cluster 5	S	Cluster_2	FGSG_11304	.	.	extr	7	Non-effector	0.525	Glycosyl hydrolase family 10	overexpressed or secreted during interaction with plant cell walls	Fusarium graminearum	Triticum aestivum	10.1002/pmic.200700184
FG001_05086	FG013_11915	FU001_05626	fuGraFG1chr3G255200.1	FGSG_11398	FGRAMPH1_01T21965	Cluster 1	SxCv	.	.	cyto	17.5	.	.	Non-effector	0.555	short chain dehydrogenase	.	.	.	.
FG001_05192	FG013_10736	FU001_05525	fuGraFG1chr3G264800.1	FGSG_11487	FGRAMPH1_01T22187	.	.	.	FGSG_11487	.	.	cyto	8	Effector	0.632	Glycosyl hydrolase family 10	.	.	.	.
FG001_05231	FG013_01628	FU001_11767	fuGraFG1chr2G074700.1	FGSG_08723	FGRAMPH1_01T10663	Cluster 3	S+Cv	.	.	cyto	14.5	.	.	Non-effector	0.859	Transaldolase/Fructose-6-phosphate aldolase	.	.	.	.
FG001_05235	FG013_01631	FU001_11764	FGSG_08721	FGSG_08721	FGRAMPH1_01T10657	Cluster 2	S	Cluster_5	.	cyto	21	.	.	Effector	0.845	Copper/zinc superoxide dismutase (SODC)	reduced virulence	Fusarium graminearum	Triticum aestivum	10.1016/j.fgb.2016.03.006
FG001_05244	FG013_01640	.	fuGraFG1chr2G073700.1	FGSG_08712	FGRAMPH1_01T10639	Cluster 5	S	.	.	cyto	16.5	.	.	Non-effector	0.909	Lyase	.	.	.	.
FG001_05261	FG013_01657	FU001_01742	fuGraFG1chr2G072100.1	FGSG_08700	FGRAMPH1_01T10605	Cluster 1	S+Cv	Cluster_4	.	pero	12.5	.	.	Non-effector	0.954	Malate synthase	.	.	.	.
FG001_05287	FG013_01683	FU001_01717	fuGraFG1chr2G069300.1	FGSG_08676	FGRAMPH1_01T10545	Cluster 2	S	Cluster_1	.	nucl	15	.	.	Non-effector	0.757	Ribosomal protein L24e	.	.	.	.
FG001_05414	FG013_01809	FU001_01582	fuGraFG1chr2G056800.1	FGSG_08561	FGRAMPH1_01T10265	.	.	Cluster_1	.	cyto	16	.	.	Non-effector	0.507	Ribosomal protein L14	.	.	.	.
FG001_05508	FG013_01905	FU001_01488	FGSG_08478	FGSG_08478	FGRAMPH1_01T10065	Cluster 2	S+Cv	.	.	nucl	10	.	.	Non-effector	0.77	Ribosomal protein L7Ae/L30e/S12e/Gadd45 family	.	.	.	.
FG001_05574	FG013_01969	FU001_01419	fuGraFG1chr2G042600.1	FGSG_08421	FGRAMPH1_01T09919	.	.	.	.	cyto	19	.	.	Non-effector	0.919	RNA recognition motif. (a.k.a. RRM, RBD, or RNP domain)	.	.	.	.
FG001_05640	FG013_02036	FU001_01342	fuGraFG1chr2G036300.1	FGSG_08359	FGRAMPH1_01T09755	Cluster 2	S+Cv	Cluster_1	.	cyto	9.5	.	.	Unlikely effector	0.54	.	.	.	.	.
FG001_05665	FG013_02060	FU001_01317	fuGraFG1chr2G033900.1	FGSG_08338	FGRAMPH1_01T09693	Cluster 2	S+Cv	.	.	cyto	22.5	.	.	Non-effector	0.633	DAHP synthetase I family	.	.	.	.
FG001_05668	FG013_02063	FU001_01314	fuGraFG1chr2G033600.1	FGSG_08335	FGRAMPH1_01T09687	.	.	.	.	nucl	19	.	.	Non-effector	0.877	Ribosomal protein L13e	.	.	.	.
FG001_05857	FG013_03861	FU001_10680	fuGraFG1chr1G185600.1	FGSG_01818	FGRAMPH1_01T04401	Cluster 2	S+Cv	.	FGSG_01818	.	.	chlo	10	Non-effector	0.765	Peptidase family M28	.	.	.	.
FG001_05917	FG013_03802	FU001_08806	fuGraFG1chr1G191100.1	FGSG_01866	FGRAMPH1_01T04521	.	.	Cluster_1	.	mito	16	.	.	Effector	0.588	Nitroreductase family	.	.	.	.
FG001_05926	FG013_03794	FU001_08812	FGSG_01871	FGSG_01871	FGRAMPH1_01T04531	Cluster 2	S+Cv	Cluster_1	.	mito	18	.	.	Non-effector	0.664	Ribosomal protein L22p/L17e	.	.	.	.
FG001_05974	FG013_03746	FU001_08858	fuGraFG1chr1G196000.1	FGSG_01917 ; FGSG_12028	FGRAMPH1_01T04631 ; FGRAMPH1_01T04629	Cluster 3	S	Cluster_1	.	nucl	12	.	.	Non-effector	0.991	Sec23/Sec24 trunk domain	.	.	.	.
FG001_05981	FG013_03739	FU001_08865	FGSG_01924	FGSG_01924	FGRAMPH1_01T04645	Cluster 2	S	.	.	nucl	14.5	.	.	Non-effector	0.971	Choline/Carnitine o-acyltransferase	.	.	.	.
FG001_06012	FG013_03709	FU001_08893	FGSG_01950	FGSG_01950	FGRAMPH1_01T04709	Cluster 2	S	.	.	cyto	23	.	.	Non-effector	0.99	Hsp70 protein	.	.	.	.
FG001_06018	FG013_03703	FU001_08898	fuGraFG1chr1G199900.1	FGSG_01955	FGRAMPH1_01T04719	.	.	.	.	nucl	15.5	.	.	Non-effector	0.627	Eukaryotic elongation factor 5A hypusine, DNA-binding OB fold	unaffected pathogenicity	Fusarium graminearum	Triticum aestivum	10.1371/journal.ppat.1002310
FG001_06046	FG013_03676	FU001_08923	fuGraFG1chr1G202100.1	FGSG_01974	FGRAMPH1_01T04769	Cluster 5	S	Cluster_5	.	cyto	20.5	.	.	Effector	0.561	Glycolipid transfer protein (GLTP)	reduced virulence	Fusarium graminearum	Triticum aestivum	10.1016/j.fgb.2008.09.004
FG001_06088	FG013_03632	FU001_08613	fuGraFG1chr1G206300.1	FGSG_02014	FGRAMPH1_01T04861	.	.	.	.	nucl	15.5	.	.	Non-effector	0.99	Hsp90 protein	reduced virulence	Fusarium graminearum	Triticum aestivum	10.1038/srep28154
FG001_06184	FG013_08220	FU001_08528	fuGraFG1chr1G215100.1	FGSG_02099	FGRAMPH1_01T05061	Cluster 2	S+Cv	.	.	cyto	12	.	.	Non-effector	0.868	Ribosomal protein L13	.	.	.	.
FG001_06575	FG013_04263	FU001_07371	fuGraFG1chr4G179900.1	FGSG_13630	FGRAMPH1_01T26455	.	.	Cluster_1	.	cyto	25.5	.	.	Non-effector	0.679	Nitronate monooxygenase	.	.	.	.
FG001_06600	FG013_04239	FU001_07393	fuGraFG1chr4G182000.1	FGSG_09690	FGRAMPH1_01T26507	Cluster 1	S+Cv	Cluster_1	.	mito	23	.	.	Effector	0.853	FKBP-type peptidyl-prolyl cis-trans isomerase	.	.	.	.
FG001_06652	FG013_04193	FU001_07438	fuGraFG1chr4G186700.1	FGSG_09643	FGRAMPH1_01T26605	.	.	.	.	cyto	17	.	.	Non-effector	0.949	short chain dehydrogenase	.	.	.	.
FG001_06663	FG013_04182	FU001_07450	fuGraFG1chr4G187900.1	FGSG_09633	FGRAMPH1_01T26627	Cluster 4	Cv	Cluster_1	.	mito	12	.	.	Non-effector	0.727	Mitochondrial carrier protein	.	.	.	.
FG001_06684	FG013_04161	FU001_07472	fuGraFG1chr4G190100.1	FGSG_09613	FGRAMPH1_01T26669	Cluster 3	S+Cv	.	.	cyto	16	.	.	Non-effector	0.99	Carbohydrate phosphorylase	.	.	.	.
FG001_06724	FG013_04119	FU001_07510	fuGraFG1chr4G193900.1	FGSG_09580	FGRAMPH1_01T26749	.	.	.	.	mito	15	.	.	Non-effector	0.592	Isocitrate/isopropylmalate dehydrogenase	.	.	.	.
FG001_06730	FG013_04113	FU001_07516	FGSG_09574	FGSG_09574	FGRAMPH1_01T26761	.	.	.	.	cyto	16.5	.	.	Non-effector	0.989	Elongation factor Tu GTP binding domain	.	.	.	.
FG001_06755	FG013_04090	FU001_07540	fuGraFG1chr4G196500.1	FGSG_09552	FGRAMPH1_01T26813	Cluster 2	S	.	.	cyto	19.5	.	.	Non-effector	0.766	DJ-1/PfpI family	.	.	.	.
FG001_06777	FG013_04067	.	FGSG_09530	FGSG_09530	FGRAMPH1_01T26865	Cluster 5	S+Cv	.	.	nucl	10.5	.	.	Non-effector	0.97	Tubulin/FtsZ family, GTPase domain	.	.	.	.
FG001_06843	FG013_04002	FU001_10369	fuGraFG1chr4G205400.1	FGSG_09471	FGRAMPH1_01T27003	.	.	.	.	extr	16	.	.	Non-effector	0.99	Hsp70 protein	.	.	.	.
FG001_06999	FG013_10537	FU001_10096	fuGraFG1chr4G220700.1	FGSG_09341	FGRAMPH1_01T27323	Cluster 6	S+Cv	.	.	cyto	20.5	.	.	Non-effector	0.968	FAD binding domain	.	.	.	.
FG001_07022	FG013_10562	FU001_11279	fuGraFG1chr4G223100.1	FGSG_09321	FGRAMPH1_01T27377	.	.	.	.	cyto	14	.	.	Non-effector	0.737	Thiolase, N-terminal domain	.	.	.	.
FG001_07094	FG013_00069	FU001_09980	FGSG_05530	FGSG_05530	FGRAMPH1_01T18141	.	.	.	.	nucl	13.5	.	.	Non-effector	0.956	ATPase family associated with various cellular activities (AAA)	.	.	.	.
FG001_07187	FG013_12310	FU001_09889	fuGraFG1chr3G095300.1	FGSG_05615	FGRAMPH1_01T18335	Cluster 3	S	.	.	cyto	21	.	.	Non-effector	0.922	S-adenosyl-L-homocysteine hydrolase	.	.	.	.
FG001_07192	FG013_12315	FU001_09885	fuGraFG1chr3G095900.1	FGSG_05619	FGRAMPH1_01T18347	.	.	.	.	cyto_nucl	14.833	.	.	Non-effector	0.99	Region in Clathrin and VPS	.	.	.	.
FG001_07214	FG013_10692	FU001_10417	fuGraFG1chr3G098200.1	FGSG_05640	FGRAMPH1_01T18395	Cluster 2	S+Cv	.	.	nucl	17	.	.	Non-effector	0.643	Ribosomal S17	.	.	.	.
FG001_07328	FG013_01605	FU001_10529	fuGraFG1chr3G109600.1	FGSG_05733	FGRAMPH1_01T18635	.	.	.	.	mito	26.5	.	.	Non-effector	0.625	Isocitrate/isopropylmalate dehydrogenase	.	.	.	.
FG001_07376	FG013_01556	FU001_02221	fuGraFG1chr3G114200.1	FGSG_05777	FGRAMPH1_01T18739	.	.	.	.	nucl	13.5	.	.	Non-effector	0.99	Eukaryotic translation initiation factor eIF2A	.	.	.	.
FG001_07396	FG013_01536	FU001_02201	fuGraFG1chr3G116200.1	FGSG_05797	FGRAMPH1_01T18783	Cluster 4	S	Cluster_4	FGSG_05797	.	.	cyto	8	Non-effector	0.97	Serine carboxypeptidase	.	.	.	.
FG001_07449	FG013_01486	FU001_02149	fuGraFG1chr3G121700.1	FGSG_05843	FGRAMPH1_01T18899	Cluster 5	S	Cluster_3	.	cyto	14.5	.	.	Non-effector	0.988	Phosphoglucose isomerase	.	.	.	.
FG001_07594	FG013_01341	FU001_02025	fuGraFG1chr3G135100.1	FGSG_05972	FGRAMPH1_01T19191	Cluster 2	S+Cv	.	.	cyto	12.5	.	.	Effector	0.789	Nucleoside diphosphate kinase	.	.	.	.
FG001_07624	FG013_01311	FU001_01997	FGSG_05997	FGSG_05997	FGRAMPH1_01T19255	.	.	.	.	nucl	10.5	.	.	Non-effector	0.964	Flavin containing amine oxidoreductase	.	.	.	.
FG001_07626	FG013_01309	FU001_01995	FGSG_05999	FGSG_05999	FGRAMPH1_01T19259	Cluster 2	S	Cluster_1	.	mito	17	.	.	Non-effector	0.539	Ribosomal L27e protein family	.	.	.	.
FG001_07679	FG013_11009	FU001_05240	FGSG_11915	FGSG_11915	FGRAMPH1_01T03081	Cluster 4	Cv	.	.	cyto	17	.	.	Non-effector	0.99	Thioredoxin	.	.	.	.
FG001_07681	FG013_11007	FU001_05242	fuGraFG1chr1G129900.1	FGSG_01245	FGRAMPH1_01T03077	.	.	.	.	mito	25	.	.	Non-effector	0.523	Peroxidase	.	.	.	.
FG001_07686	FG013_12285	.	.	FGSG_01241	FGRAMPH1_01T03069	Cluster 2	S	.	.	cyto_nucl	14.5	.	.	Non-effector	0.942	14-3-3 protein	reduced virulence	Beauveria bassiana	Beauveria bassiana	10.1111/1462-2920.12634
FG001_07736	FG013_12237	FU001_12386	FGSG_01199	FGSG_01199	FGRAMPH1_01T02969	Cluster 2	S	.	.	plas	8	.	.	Non-effector	0.99	SIS domain	.	.	.	.
FG001_07786	FG013_10856	FU001_06044	fuGraFG1chr1G120300.1	FGSG_01154	FGRAMPH1_01T02865	Cluster 2	S+Cv	.	.	cyto_nucl	13.5	.	.	Unlikely effector	0.504	Ribosomal protein L6	.	.	.	.
FG001_07807	FG013_10835	FU001_06062	fuGraFG1chr1G118700.1	FGSG_01133	FGRAMPH1_01T02817	Cluster 4	Cv	.	.	cyto	16.5	.	.	Non-effector	0.952	Phosphoglucomutase/phosphomannomutase, alpha/beta/alpha domain I	.	.	.	.
FG001_07829	FG013_10813	.	fuGraFG1chr1G116600.1	FGSG_01111	FGRAMPH1_01T02771	.	.	.	.	mito	15	.	.	Non-effector	0.964	6-phosphogluconate dehydrogenase, C-terminal domain	.	.	.	.
FG001_07867	FG013_09421	FU001_06122	fuGraFG1chr1G114000.1	FGSG_01081	FGRAMPH1_01T02697	.	.	.	.	mito	17	.	.	Non-effector	0.644	ribosomal L5P family C-terminus	.	.	.	.
FG001_07868	FG013_09418	FU001_06123	fuGraFG1chr1G113900.1	FGSG_15824	FGRAMPH1_01T02695	Cluster 1	S+Cv	.	.	mito	24.5	.	.	Non-effector	0.95	ATP synthase alpha/beta family, nucleotide-binding domain	.	.	.	.
FG001_07936	FG013_09349	FU001_06188	fuGraFG1chr1G107000.1	FGSG_01016	FGRAMPH1_01T02549	Cluster 2	S	.	.	nucl	10	.	.	Non-effector	0.532	Ribosomal protein L6e	.	.	.	.
FG001_07938	FG013_09347	.	fuGraFG1chr1G106800.1	FGSG_01014	FGRAMPH1_01T02545	.	.	Cluster_4	.	mito	9	.	.	Non-effector	0.511	ADP-ribosylation factor family	.	.	.	.
FG001_07977	FG013_11838	FU001_09594	fuGraFG1chr1G102700.1	FGSG_00979	FGRAMPH1_01T02461	.	.	.	.	cyto	23.5	.	.	Non-effector	0.949	Aldehyde dehydrogenase family	.	.	.	.
FG001_08043	FG013_11442	FU001_09524	fuGraFG1chr1G096200.1	FGSG_00921	FGRAMPH1_01T02317	.	.	.	.	cyto	15	.	.	Non-effector	0.97	Hsp70 protein	.	.	.	.
FG001_08096	FG013_05256	FU001_05254	fuGraFG1chr1G090200.1	FGSG_00872	FGRAMPH1_01T02183	Cluster 3	S+Cv	.	.	cyto	21.5	.	.	Non-effector	0.985	UTP--glucose-1-phosphate uridylyltransferase	.	.	.	.
FG001_08129	FG013_05222	FU001_05288	FGSG_11839 ; fuGraFG1chr1G087400.1	FGSG_11839 ; FGSG_00845	FGRAMPH1_01T02117 ; FGRAMPH1_01T02115	Cluster 2	S+Cv	.	.	mito	14	.	.	Non-effector	0.991	Ribosomal L15	.	.	.	.
FG001_08139	FG013_05212	FU001_05297	fuGraFG1chr1G086700.1	FGSG_00838	FGRAMPH1_01T02095	.	.	Cluster_4	.	cyto	17	.	.	Non-effector	0.95	Hsp70 protein	.	.	.	.
FG001_08167	FG013_11579	FU001_06476	fuGraFG1chr4G163100.1	FGSG_07953	FGRAMPH1_01T26065	.	.	.	.	mito	12	.	.	Non-effector	0.947	Aconitase family (aconitate hydratase)	.	.	.	.
FG001_08232	FG013_10369	FU001_06541	fuGraFG1chr4G156800.1	FGSG_07896	FGRAMPH1_01T25923	Cluster 5	S	Cluster_3	.	cyto	8.5	.	.	Non-effector	0.977	Transferase family	involved in self-protection against DON	Fusarium graminearum	.	10.1074/jbc.273.3.1654 / 10.1128/AEM.02017-09
FG001_08278	FG013_10324	FU001_06585	fuGraFG1chr4G152800.1	FGSG_07856	FGRAMPH1_01T25827	Cluster 2	S+Cv	.	.	mito	11	.	.	Non-effector	0.752	Ribosomal proteins 50S-L15, 50S-L18e, 60S-L27A	.	.	.	.
FG001_08374	FG013_12093	FU001_06673	fuGraFG1chr4G144000.1	FGSG_07775	FGRAMPH1_01T25637	Cluster 4	S	Cluster_4	FGSG_07775	.	.	extr	6	Non-effector	0.962	Eukaryotic aspartyl protease	.	.	.	.
FG001_08498	FG013_11535	FU001_10831	fuGraFG1chr4G132400.1	FGSG_07678	FGRAMPH1_01T25367	.	.	Cluster_4	FGSG_07678	.	.	chlo	7	Non-effector	0.645	Phosphoesterase family	reduced virulence	Fusarium graminearum	Zea mays	10.1371/journal.ppat.1005485
FG001_08507	FG013_12844	FU001_10841	fuGraFG1chr4G131400.1	FGSG_07671	FGRAMPH1_01T25345	Cluster 1	S+Cv	.	FGSG_07671	.	.	chlo	9	Non-effector	0.916	Serine aminopeptidase, S33	.	.	.	.
FG001_08655	FG013_09912	FU001_07024	fuGraFG1chr4G117500.1	FGSG_07536	FGRAMPH1_01T25041	Cluster 2	S+Cv	.	.	cyto	17.5	.	.	Effector	0.85	AhpC/TSA family	involved in ROS defence	Fusarium graminearum	.	10.1534/g3.116.027987
FG001_08666	FG013_09901	FU001_07015	fuGraFG1chr4G116600.1	FGSG_07528	FGRAMPH1_01T25023	Cluster 3	S+Cv	.	.	cyto	22	.	.	Non-effector	0.922	Pyruvate kinase, barrel domain	.	.	.	.
FG001_08823	FG013_03482	FU001_02444	fuGraFG1chr1G253400.1	FGSG_02461	FGRAMPH1_01T05905	.	.	.	.	mito	14	.	.	Effector	0.57	lactate/malate dehydrogenase, alpha/beta C-terminal domain	.	.	.	.
FG001_08870	FG013_03529	FU001_02493	fuGraFG1chr1G257800.1	FGSG_02503	FGRAMPH1_01T06009	Cluster 5	S	.	.	nucl	14	.	.	Effector	0.606	Ribosomal L28e protein family	.	.	.	.
FG001_08871	FG013_03530	FU001_02494	FGSG_02504	FGSG_02504	FGRAMPH1_01T06011	Cluster 5	S	.	.	extr	10	.	.	Unlikely effector	0.505	lactate/malate dehydrogenase, alpha/beta C-terminal domain	.	.	.	.
FG001_08911	FG013_03569	FU001_02531	fuGraFG1chr1G261400.1	FGSG_02541	FGRAMPH1_01T06101	.	.	.	.	mito	15	.	.	Effector	0.562	Ribosomal protein S11	.	.	.	.
FG001_08913	FG013_03571	FU001_02532	FGSG_02542	FGSG_02542	FGRAMPH1_01T06103	Cluster 2	S+Cv	.	.	nucl	12.5	.	.	Non-effector	0.903	Ribosomal L30 N-terminal domain	.	.	.	.
FG001_08965	FG013_03624	FU001_02583	fuGraFG1chr1G266200.1	FGSG_02588	FGRAMPH1_01T06213	Cluster 2	S	Cluster_1	.	cyto	14	.	.	Non-effector	0.519	Ribosomal protein S19e	.	.	.	.
FG001_09170	FG013_12815	FU001_11712	fuGraFG1chr1G285800.1	FGSG_02770	FGRAMPH1_01T06647	Cluster 3	S+Cv	.	.	cyto	21.5	.	.	Non-effector	0.667	Fructose-bisphosphate aldolase class-II	.	.	.	.
FG001_09403	FG013_04836	FU001_09856	fuGraFG1chr1G165000.1	FGSG_01604	FGRAMPH1_01T03919	.	.	.	.	cyto	16.5	.	.	Non-effector	0.99	Peptidase family M1 domain	.	.	.	.
FG001_09420	FG013_04819	FU001_09839	fuGraFG1chr1G163500.1	FGSG_01591	FGRAMPH1_01T03885	Cluster 2	S	.	.	cyto	10	.	.	Non-effector	0.786	Mitochondrial carrier protein	.	.	.	.
FG001_09443	FG013_04794	FU001_09812	fuGraFG1chr1G161500.1	FGSG_01572	FGRAMPH1_01T03831	Cluster 6	S+Cv	.	.	cysk	18	.	.	Non-effector	0.933	Pyridoxal-dependent decarboxylase conserved domain	.	.	.	.
FG001_09497	FG013_04743	FU001_09759	fuGraFG1chr1G157000.1	FGSG_01523	FGRAMPH1_01T03723	Cluster 3	S+Cv	.	.	cyto	17.5	.	.	Non-effector	0.695	Aldo/keto reductase family	.	.	.	.
FG001_09505	FG013_04737	.	fuGraFG1chr1G156400.1	FGSG_01516	FGRAMPH1_01T03709	Cluster 2	S	.	.	nucl	15.5	.	.	Non-effector	0.755	Ribosomal proteins 50S-L18Ae/60S-L20/60S-L18A	.	.	.	.
FG001_09512	FG013_04730	FU001_12674	fuGraFG1chr1G155700.1	FGSG_01509	FGRAMPH1_01T03695	.	.	.	.	cyto	10	.	.	Non-effector	0.789	Ribosomal protein S5, N-terminal domain	.	.	.	.
FG001_09535	FG013_04707	FU001_12699	fuGraFG1chr1G153500.1	FGSG_01485	FGRAMPH1_01T03645	Cluster 2	S+Cv	.	.	cyto	12	.	.	Non-effector	0.931	Aldose 1-epimerase	.	.	.	.
FG001_09547	FG013_05177	FU001_05332	fuGraFG1chr1G083500.1	FGSG_00806	FGRAMPH1_01T02019	Cluster 5	S	.	FGSG_00806	.	.	chlo	5	Non-effector	0.885	Subtilase family	.	.	.	.
FG001_09552	FG013_05172	FU001_05336	FGSG_00802	FGSG_00802	FGRAMPH1_01T02011	Cluster 2	S+Cv	Cluster_1	.	cyto	15	.	.	Effector	0.756	Ribosomal protein L14p/L23e	.	.	.	.
FG001_09581	FG013_05145	FU001_05359	FGSG_00777	FGSG_00777	FGRAMPH1_01T01953	.	.	.	.	cyto	17.5	.	.	Effector	0.891	Cyclophilin type peptidyl-prolyl cis-trans isomerase/CLD	.	.	.	.
FG001_09700	FG013_05026	FU001_05475	FGSG_00671	FGSG_00671	FGRAMPH1_01T01691	Cluster 4	Cv	.	.	mito	10	.	.	Non-effector	0.737	Ribosomal_S17 N-terminal	unaffected pathogenicity	Fusarium graminearum	.	10.1371/journal.ppat.1002310
FG001_09727	FG013_04999	FU001_03209	fuGraFG1chr1G065600.1	FGSG_00644	FGRAMPH1_01T01623	.	.	Cluster_4	.	mito	26.5	.	.	Non-effector	0.921	Insulinase (Peptidase family M16)	.	.	.	.
FG001_09732	FG013_04994	FU001_03214	fuGraFG1chr1G065100.1	FGSG_00639 ; FGSG_00638	FGRAMPH1_01T01613 ; FGRAMPH1_01T01611	Cluster 5	S+Cv	.	.	cysk	11	.	.	Non-effector	0.99	Tubulin/FtsZ family, GTPase domain	loss of pathogenicity	Aspergillus fumigatus	.	10.1371/journal.ppat.0030024
FG001_09736	FG013_04990	FU001_03218	FGSG_00634	FGSG_00634	FGRAMPH1_01T01603	Cluster 2	S+Cv	Cluster_1	.	cyto	12	.	.	Non-effector	0.91	Ribosomal protein S6e	.	.	.	.
FG001_09739	FG013_04987	FU001_03221	fuGraFG1chr1G064400.1	FGSG_00631	FGRAMPH1_01T01597	Cluster 2	S+Cv	.	.	nucl	13	.	.	Non-effector	0.829	Ribosomal protein S8e	.	.	.	.
FG001_09801	FG013_11824	FU001_03284	fuGraFG1chr1G057400.1	FGSG_00571	FGRAMPH1_01T01453	Cluster 6	S+Cv	.	.	extr	24	.	.	Non-effector	0.908	Glycosyl hydrolase family 7	.	.	.	.
FG001_09813	FG013_11812	FU001_03299	fuGraFG1chr1G056300.1	FGSG_00561	FGRAMPH1_01T01427	Cluster 3	S+Cv	.	.	mito	27	.	.	Non-effector	0.525	Cytochrome C1 family	.	.	.	.
FG001_09875	FG013_04297	FU001_11346	fuGraFG1chr4G229900.1	FGSG_09266	FGRAMPH1_01T27519	Cluster 3	S	.	.	cyto	21.5	.	.	Non-effector	0.735	Hydroxymethylglutaryl-coenzyme A synthase C terminal	.	.	.	.
FG001_10238	FG013_00985	FU001_10937	FGSG_06289	FGSG_06289	FGRAMPH1_01T19953	.	.	.	.	mito	19.5	.	.	Non-effector	0.991	Ribosomal protein L3	.	.	.	.
FG001_10259	FG013_01007	FU001_10918	fuGraFG1chr3G167700.1	FGSG_06270	FGRAMPH1_01T19911	Cluster 2	S+Cv	Cluster_1	.	mito	17	.	.	Non-effector	0.539	Plectin/S10 domain	.	.	.	.
FG001_10272	FG013_01020	FU001_10904	fuGraFG1chr3G166400.1	FGSG_16627	FGRAMPH1_01T19883	Cluster 4	S	.	.	cyto	27	.	.	Effector	0.587	Glyceraldehyde 3-phosphate dehydrogenase, C-terminal domain	.	.	.	.
FG001_10285	FG013_01034	FU001_10893	fuGraFG1chr3G165100.1	FGSG_06246	FGRAMPH1_01T19857	.	.	.	.	mito	26	.	.	Non-effector	0.948	TCP-1/cpn60 chaperonin family	.	.	.	.
FG001_10356	FG013_01104	FU001_01791	FuGraFG1chr3G157700.1	FGSG_06183	FGRAMPH1_01T19697	Cluster 1	Cv	.	.	mito	25	.	.	Non-effector	0.99	Lon protease (S16) C-terminal proteolytic domain	.	.	.	.
FG001_10286	FG013_01035	FU001_10891	FGSG_06245	FGSG_06245	FGRAMPH1_01T19853	Cluster 3	Cv	.	.	cyto	20.5	.	.	Effector	0.642	Cofilin/tropomyosin-type actin-binding protein	.	.	.	.
FG001_10377	FG013_01125	FU001_01812	fuGraFG1chr3G155700.1	FGSG_06166	FGRAMPH1_01T19653	Cluster 6	S+Cv	.	.	cyto	15.5	.	.	Non-effector	0.933	GDP dissociation inhibitor	.	.	.	.
FG001_10390	FG013_01137	FU001_01826	fuGraFG1chr3G154600.1	FGSG_06154	FGRAMPH1_01T19623	.	.	.	.	mito	25	.	.	Non-effector	0.969	Hsp70 protein	.	.	.	.
FG001_10426	FG013_01172	FU001_01862	FGSG_06127	FGSG_06127	FGRAMPH1_01T19545	.	.	.	.	cyto	26.5	.	.	Non-effector	0.667	D-isomer specific 2-hydroxyacid dehydrogenase, NAD binding domain	.	.	.	.
FG001_10502	FG013_01242	FU001_01933	fuGraFG1chr3G144300.1	FGSG_06059	FGRAMPH1_01T19389	Cluster 2	S	.	.	cyto	24.5	.	.	Non-effector	0.606	Aldose 1-epimerase	.	.	.	.
FG001_10526	FG013_01265	FU001_01952	fuGraFG1chr3G141800.1 ; fuGraFG1chr3G141900.1	FGSG_12857 ; FGSG_12858	FGRAMPH1_01T19345	.	.	Cluster_3	.	cyto	10.5	.	.	Non-effector	0.991	Citrate synthase, C-terminal domain	loss of pathogenicity	Fusarium graminearum	Triticum aestivum	10.1016/j.fgb.2011.01.002
FG001_10527	FG013_01266	FU001_01953	fuGraFG1chr3G141700.1	FGSG_06039	FGRAMPH1_01T19343	.	.	Cluster_3	.	cyto	17	.	.	Non-effector	0.984	ATP citrate lyase citrate-binding	loss of pathogenicity	Fusarium graminearum	Triticum aestivum	10.1016/j.fgb.2011.01.002
FG001_10545	FG013_01284	FU001_01970	fuGraFG1chr3G140200.1	FGSG_06021	FGRAMPH1_01T19307	.	.	.	.	mito	11	.	.	Unlikely effector	0.513	Mitochondrial carrier protein	.	.	.	.
FG001_10547	FG013_01286	FU001_01973	fuGraFG1chr3G140000.1	FGSG_06019	FGRAMPH1_01T19301	Cluster 3	S+Cv	.	.	cyto	21.5	.	.	Effector	0.829	Ribosomal protein S7p/S5e	.	.	.	.
FG001_10559	FG013_12775	FU001_11785	FGSG_08737	FGSG_08737	FGRAMPH1_01T10701	Cluster 3	S+Cv	.	.	nucl	20.5	.	.	Non-effector	0.979	.	reduced virulence	Fusarium graminearum	Triticum aestivum	10.1371/journal.ppat.1002310
FG001_10643	FG013_07377	FU001_10258	fuGraFG1chr2G084600.1	FGSG_08811	FGRAMPH1_01T10877	.	.	.	.	cyto	27	.	.	Non-effector	0.863	Elongation factor Tu GTP binding domain	.	.	.	.
FG001_10704	FG013_07429	FU001_10210	fuGraFG1chr2G089700.1	FGSG_08851	FGRAMPH1_01T10989	Cluster 3	S+Cv	.	.	mito	26	.	.	Non-effector	0.968	MmgE/PrpD family	.	.	.	.
FG001_10758	FG013_07482	FU001_12607	fuGraFG1chr2G094300.1	FGSG_08895	FGRAMPH1_01T11111	Cluster 5	S	Cluster_1	.	mito	11	.	.	Effector	0.643	Ribosomal protein L21e	.	.	.	.
FG001_10759	FG013_07483	FU001_12608	fuGraFG1chr2G094400.1	FGSG_08896	FGRAMPH1_01T11113	Cluster 2	S+Cv	.	.	mito	13	.	.	Non-effector	0.904	S4 domain	.	.	.	.
FG001_11055	FG013_08881	FU001_06331	FGSG_04574	FGSG_04574	FGRAMPH1_01T15615	.	.	.	.	nucl	14.5	.	.	Non-effector	0.968	Ankyrin repeats (3 copies)	.	.	.	.
FG001_11343	FG013_02588	FU001_03487	fuGraFG1chr1G039300.1 ; fuGraFG1chr1G039400.1	FGSG_00387 ; FGSG_00388	FGRAMPH1_01T01013 ; FGRAMPH1_01T01015	Cluster 5	S	.	.	cyto	11.5	.	.	Non-effector	0.99	Phosphoglucomutase/phosphomannomutase, alpha/beta/alpha domain I	.	.	.	.
FG001_11352	FG013_02599	FU001_03478	fuGraFG1chr1G040200.1	FGSG_00397	FGRAMPH1_01T01037	Cluster 5	S+Cv	Cluster_4	.	cyto	14	.	.	Non-effector	0.99	Tubulin/FtsZ family, GTPase domain	.	.	.	.
FG001_11453	FG013_09091	FU001_04490 ; FU001_04488	fuGraFG1chr2G014000.1 ; FGSG_08122	FGSG_08121 ; FGSG_08122	FGRAMPH1_01T09161	.	.	.	FGSG_08122	.	.	chlo	8	Non-effector	0.991	Ferric reductase like transmembrane component	.	.	.	.
FG001_11496	FG013_09136	FU001_04452	fuGraFG1chr2G010400.1	FGSG_08081	FGRAMPH1_01T09071	.	.	Cluster_4	.	nucl	11	.	.	Non-effector	0.679	2OG-Fe(II) oxygenase superfamily	.	.	.	.
FG001_11500	FG013_09140	FU001_04448	fuGraFG1chr2G010000.1	FGSG_08077	FGRAMPH1_01T09063	.	.	.	.	cyto	21.5	.	.	Non-effector	0.702	NADH:flavin oxidoreductase / NADH oxidase family	.	.	.	.
FG001_11531	FG013_09168	FU001_04421	fuGraFG1chr2G007200.1	FGSG_08048	FGRAMPH1_01T08995	Cluster 3	S	.	FGSG_08048	.	.	chlo	5	Non-effector	0.743	LVIVD repeat	.	.	.	.
FG001_11633	FG013_11052	FU001_05201	fuGraFG1chr1G133800.1	FGSG_01278	FGRAMPH1_01T03165	Cluster 4	Cv	.	.	mito	16	.	.	Effector	0.564	Ribosomal protein L35Ae	.	.	.	.
FG001_11708	FG013_09284	FU001_05130	fuGraFG1chr1G140400.1	FGSG_01346	FGRAMPH1_01T03321	.	.	.	.	cyto	23.5	.	.	Non-effector	0.94	Enolase, C-terminal TIM barrel domain	.	.	.	.
FG001_11812	FG013_06948	FU001_11039	fuGraFG1chr1G295700.1	FGSG_09933	FGRAMPH1_01T06863	Cluster 1	Cv	.	.	cyto	12	.	.	Non-effector	0.665	Eukaryotic porin	.	.	.	.
FG001_11960	FG013_12638	FU001_03609	fuGraFG1chr1G003600.1	FGSG_00028	FGRAMPH1_01T00105	.	.	.	FGSG_00028	.	.	chlo	10	Effector	0.608	Pregnancy-associated plasma protein-A	.	.	.	.
FG001_12107	FG013_02366	FU001_03796	fuGraFG1chr1G020100.1	FGSG_00192	FGRAMPH1_01T00521	.	.	Cluster_5	FGSG_00192	.	.	chlo	9	Non-effector	0.93	Subtilase family	.	.	.	.
FG001_12116	FG013_02375	FU001_03804	fuGraFG1chr1G020900.1	FGSG_00200	FGRAMPH1_01T00539	.	.	.	.	cyto	10.5	.	.	Non-effector	0.948	GMC oxidoreductase	.	.	.	.
FG001_12200	FG013_09192	FU001_05035	fuGraFG1chr1G147900.1	FGSG_01433	FGRAMPH1_01T03523	Cluster 2	Cv	.	.	cyto	13.5	.	.	Non-effector	0.88	Glutamine amidotransferases class-II	.	.	.	.
FG001_12212	FG013_09203	FU001_05050	FGSG_01422	FGSG_01422	FGRAMPH1_01T03497	Cluster 2	S	.	.	mito	13	.	.	Non-effector	0.911	Citrate synthase, C-terminal domain	.	.	.	.
FG001_12215	FG013_09206	FU001_05053	fuGraFG1chr1G146600.1	FGSG_01419	FGRAMPH1_01T03491	Cluster 2	Cv	.	.	cyto	12	.	.	Non-effector	0.987	AMP-binding enzyme	.	.	.	.
FG001_12234	FG013_09224	FU001_05072	fuGraFG1chr1G144900.1	FGSG_15846	FGRAMPH1_01T03447	Cluster 2	S	.	.	cyto	10	.	.	Effector	0.589	NADPH-dependent FMN reductase	.	.	.	.
FG001_12290	FG013_02705	.	fuGraFG1chr1G050100.1	FGSG_00496	FGRAMPH1_01T01267	Cluster 2	S+Cv	Cluster_3	.	mito	18.5	.	.	Non-effector	0.86	Inorganic pyrophosphatase	.	.	.	.
FG001_12295	FG013_02700	FU001_03374	fuGraFG1chr1G049600.1	FGSG_00491	FGRAMPH1_01T01257	Cluster 5	S	.	.	cyto	10.5	.	.	Non-effector	0.951	Calreticulin family	.	.	.	.
FG001_12621	FG013_03100	FU001_03121	fuGraFG1chr3G190200.1	FGSG_10782	FGRAMPH1_01T20455	.	.	.	.	extr	22	.	.	Non-effector	0.931	Eukaryotic aspartyl protease	.	.	.	.
FG001_12625	FG013_03104	FU001_03124	fuGraFG1chr3G189900.1	FGSG_10779	FGRAMPH1_01T20447	.	.	Cluster_3	.	cyto_nucl	9.5	.	.	Non-effector	0.765	CRAL/TRIO domain	.	.	.	.
FG001_12666	FG013_03145	FU001_03164	fuGraFG1chr3G186400.1	FGSG_10746	FGRAMPH1_01T20357	.	.	.	.	mito	24.5	.	.	Non-effector	0.706	Aminotransferase class I and II	.	.	.	.
FG001_12676	FG013_03154	FU001_03173	fuGraFG1chr3G185400.1	FGSG_10737	FGRAMPH1_01T20335	.	.	Cluster_3	.	cyto	13	.	.	Unlikely effector	0.519	Adenylate kinase	.	.	.	.
FG001_12680	FG013_03158	FU001_03178	fuGraFG1chr3G185000.1	FGSG_10733	FGRAMPH1_01T20325	Cluster 3	Cv	Cluster_1	.	mito	11	.	.	Effector	0.618	Ribosomal protein S12/S23	unaffected pathogenicity	Fusarium graminearum	Triticum aestivum	10.1371/journal.ppat.1002310
FG001_12776	FG013_10420	FU001_10074	fuGraFG1chr4G166500.1	FGSG_09844	FGRAMPH1_01T26147	.	.	.	.	mito	22.5	.	.	Non-effector	0.943	Pyridine nucleotide-disulphide oxidoreductase	.	.	.	.
FG001_12794	FG013_10400	FU001_10092	FGSG_11627	FGSG_11627	FGRAMPH1_01T26109	.	.	Cluster_1	.	nucl	14	.	.	Effector	0.694	C-terminus of histone H2A	unaffected pathogenicity	Fusarium graminearum	Triticum aestivum	10.1371/journal.ppat.1002310
FG001_12846	FG013_10171	FU001_10617	fuGraFG1chr4G000600.1	FGSG_06445	FGRAMPH1_01T22295	.	.	.	.	extr	21	.	.	Unlikely effector	0.548	Glycosyl hydrolase family 10	.	.	.	.
FG001_12867	FG013_11113	FU001_06429	FGSG_04476	FGSG_04476	FGRAMPH1_01T15393	Cluster 1	S+Cv	.	.	mito	11	.	.	Non-effector	0.652	Ribosomal protein S24e	.	.	.	.
FG001_12992	FG013_00111	FU001_12541	fuGraFG1chr3G083400.1	FGSG_05493	FGRAMPH1_01T18055	Cluster 2	S+Cv	Cluster_5	.	nucl	11.5	.	.	Unlikely effector	0.539	Ribosomal protein S10p/S20e	.	.	.	.
FG001_13012	FG013_12204	FU001_07862	fuGraFG1chr3G014300.1	FGSG_04826	FGRAMPH1_01T16403	Cluster 2	S+Cv	Cluster_5	.	cyto	23.5	.	.	Effector	0.681	Enoyl-(Acyl carrier protein) reductase	.	.	.	.
FG001_13076	FG013_07016	FU001_10972	FGSG_09866	FGSG_09866	FGRAMPH1_01T06713	Cluster 2	S+Cv	.	.	cyto	11.5	.	.	Non-effector	0.896	Ribosomal protein 60S L18 and 50S L18e	.	.	.	.
FG001_13080	FG013_07012	FU001_10976	fuGraFG1chr1G288800.1	FGSG_09870	FGRAMPH1_01T06721	.	.	.	.	cyto_nucl	12.333	.	.	Non-effector	0.731	WD domain, G-beta repeat	reduced virulence	Aspergillus fumigatus	Mus musculus	10.3389/fmicb.2016.00106
FG001_12393	FG013_00858	.	FGSG_06407	FGSG_06407	FGRAMPH1_01T20229	Cluster 3	S	.	.	mito	15	.	.	Effector	0.933	Ribosomal protein S27	.	.	.	.
FG001_10506	FG013_01248	FU001_01936	fuGraFG1chr3G143600.1	FGSG_16595	FGRAMPH1_01T19379	Cluster 3	S+Cv	.	.	cyto	25	.	.	Non-effector	0.984	BPG-independent PGAM N-terminus (iPGM_N)	.	.	.	.
FG001_05286	FG013_01682	.	fuGraFG1chr2G069400.1	FGSG_08677	FGRAMPH1_01T10547	Cluster 5	S	Cluster_1	.	cyto	25	.	.	Effector	0.797	Redoxin	.	.	.	.
FG001_12367	FG013_02627	FU001_03448	fuGraFG1chr1G042600.1	FGSG_00421	FGRAMPH1_01T01095	Cluster 2	S	.	.	cyto	18	.	.	Non-effector	0.641	S-adenosylmethionine synthetase, C-terminal domain	.	.	.	.
.	FG013_02989	FU001_03014	fuGraFG1chr3G201100.1	FGSG_10885	FGRAMPH1_01T20713	Cluster 3	S+Cv	.	.	mito	21.5	.	.	Non-effector	0.845	ATP-grasp domain	.	.	.	.
.	FG013_03021	FU001_03042	.	FGSG_10855	FGRAMPH1_01T20639	Cluster 3	S+Cv	.	.	cyto	20.5	.	.	Unlikely effector	0.548	Alcohol dehydrogenase GroES-like domain	.	.	.	.
.	FG013_03033	FU001_03054	fuGraFG1chr3G196800.1	FGSG_10845	FGRAMPH1_01T20613	Cluster 4	Cv	Cluster_1	.	nucl	14.5	.	.	Non-effector	0.599	Ribosomal proteins L26 eukaryotic, L24P archaeal	.	.	.	.
.	FG013_03055	.	fuGraFG1chr3G194300.1	FGSG_10825	FGRAMPH1_01T20565	.	.	.	.	cyto	13	.	.	Non-effector	0.989	Cobalamin-independent synthase, Catalytic domain	reduced virulence	Fusarium graminearum	Triticum aestivum	10.1094/PHYTO-95-0744
.	FG013_03517	FU001_02481	fuGraFG1chr1G256700.1	FGSG_02493	FGRAMPH1_01T05985	Cluster 2	S+Cv	.	.	nucl	13	.	.	Unlikely effector	0.545	Ribosomal protein L23, N-terminal domain	.	.	.	.
FG001_09733	FG013_04993	FU001_03215	fuGraFG1chr1G064900.1	FGSG_00637	FGRAMPH1_01T01609	.	.	Cluster_2	.	cysk	20	.	.	Non-effector	0.95	ATP synthase alpha/beta family, nucleotide-binding domain	.	.	.	.
.	FG013_06902	FU001_11976	FGSG_09974	FGSG_09974	FGRAMPH1_01T06963	Cluster 2	S+Cv	.	.	nucl	14.5	.	.	Unlikely effector	0.543	Ribosomal L22e protein family	.	.	.	.
FG001_11874	FG013_07008	FU001_10980	FGSG_17593	FGSG_17593	FGRAMPH1_01T06729	.	.	.	.	cyto	12.5	.	.	Non-effector	0.781	Domain of unknown function (DUF3554)	.	.	.	.
FG001_01547	FG013_07084	FU001_09436	fuGraFG1chr2G137800.1	FGSG_16325	FGRAMPH1_01T12103	.	.	.	.	cysk	16	.	.	Non-effector	0.991	Heterokaryon incompatibility protein (HET)	.	.	.	.
FG001_00476 ; FG001_00474	FG013_07718	FU001_04149	FGSG_07075	FGSG_07075	FGRAMPH1_01T23899	Cluster 6	S+Cv	.	.	cyto	12	.	.	Non-effector	0.989	Carbamoyl-phosphate synthase L chain, ATP binding domain	unaffected pathogenicity	Fusarium graminearum	Triticum aestivum	10.1371/journal.ppat.1002310
FG001_07944	FG013_09341	.	fuGraFG1chr1G106000.1	FGSG_01008	FGRAMPH1_01T02529	Cluster 5	S	.	.	cyto	16.5	.	.	Non-effector	0.916	EF-1 guanine nucleotide exchange domain	.	.	.	.
FG001_07842	FG013_09444	FU001_06097	FGSG_01099	FGSG_01099	FGRAMPH1_01T02743	Cluster 3	S	.	.	cyto	17	.	.	Effector	0.748	Ras family	.	.	.	.
FG001_12793	FG013_10403	FU001_10090	FGSG_11626	FGSG_11626	FGRAMPH1_01T26111	.	.	Cluster_1	.	nucl	22.5	.	.	Non-effector	0.643	Core histone H2A/H2B/H3/H4	.	.	.	.
FG001_07182	FG013_12305	FU001_09892	fuGraFG1chr3G094800.1	FGSG_05610	FGRAMPH1_01T18325	Cluster 4	Cv	Cluster_2	.	mito	26	.	.	Effector	0.612	2Fe-2S iron-sulfur cluster binding domain	.	.	.	.
FG001_02768 ; FG001_02767	FG013_09747 ; FG013_09746	FU001_00333	FGSG_10487 ; FGSG_10486	FGSG_10487 ; FGSG_10486	FGRAMPH1_01T08225 ; FGRAMPH1_01T08223	.	.	.	.	nucl	14	.	.	Non-effector	0.991	.	.	.	.	.
FG001_11349	FG013_02595	FU001_03480	FGSG_00395	FGSG_00395	FGRAMPH1_01T01033	Cluster 2	S+Cv	.	.	nucl	15	.	.	Non-effector	0.706	Ribosomal protein S19	.	.	.	.
FG001_08139	FG013_05212	FU001_05297	fuGraFG1chr1G086700.1	FGSG_00838	FGRAMPH1_01T02095	.	.	Cluster_4	.	cyto	17	.	.	Non-effector	0.95	Hsp70 protein	.	.	.	.
FG001_06027	FG013_03694	FU001_08906	FGSG_01962	FGSG_01962	FGRAMPH1_01T04735	Cluster 2	S	.	.	cysk	16	.	.	Non-effector	0.972	Arginosuccinate synthase	.	.	.	.
FG001_05243 ; FG001_05242	FG013_01639 ; FG013_01638	FU001_11757	fuGraFG1chr2G073800.1 ; FGSG_08714	FGSG_08713 ; FGSG_08714	FGRAMPH1_01T10641 ; FGRAMPH1_01T10643	Cluster 3	S+Cv	.	.	mito	16	.	.	Non-effector	0.976	Ribosomal family S4e	unaffected pathogenicity	Fusarium graminearum	Triticum aestivum	10.1371/journal.ppat.1002310
FG001_00091	FG013_08546	FU001_04915	fuGraFG1chr4G103900.1	FGSG_07401	FGRAMPH1_01T24731	Cluster 1	S	.	.	cyto	15	.	.	Non-effector	0.811	Elongation factor 1 gamma, conserved domain	.	.	.	.
FG001_00560	FG013_06473	FU001_04067	fuGraFG1chr4G060100.1 ; fuGraFG1chr4G060200.1	FGSG_07004 ; FGSG_13041	FGRAMPH1_01T23721 ; FGRAMPH1_01T23725	Cluster 6	S+Cv	.	.	mito	16	.	.	Non-effector	0.99	ATP synthase alpha/beta family, nucleotide-binding domain	.	.	.	.
FG001_00681	FG013_06354	FU001_03945	fuGraFG1chr4G047900.1	FGSG_06895	FGRAMPH1_01T23443	.	.	.	FGSG_06895	.	.	chlo	5	Non-effector	0.955	Serine carboxypeptidase	.	.	.	.
FG001_01765	FG013_09461	FU001_12126	fuGraFG1chr2G157600.1	FGSG_03311	FGRAMPH1_01T12573	.	.	.	.	cyto	13.5	.	.	Non-effector	0.968	Mannitol dehydrogenase C-terminal domain	.	.	.	.
FG001_02052	FG013_05643	FU001_12061	fuGraFG1chr2G183400.1	FGSG_03569	FGRAMPH1_01T13185	.	.	Cluster_2	FGSG_03569	.	.	extr	8	Non-effector	0.951	Domain of unknown function (DUF1929)	.	.	.	.
FG001_02081	FG013_05673	FU001_00755	fuGraFG1chr2G186300.1	FGSG_03598	FGRAMPH1_01T13251	Cluster 2	Cv	.	FGSG_03598	.	.	chlo	10	Non-effector	0.848	BNR/Asp-box repeat	enhances wheat head blight susceptibility	Fusarium graminearum	Triticum aestivum	10.1002/pmic.200700184 / 10.1094/MPMI-06-18-0170-R
FG001_02129	FG013_05721	FU001_00801	fuGraFG1chr2G190400.1	FGSG_03638	FGRAMPH1_01T13349	Cluster 3	S+Cv	.	.	cyto	18.5	.	.	Non-effector	0.969	GMC oxidoreductase	.	.	.	.
FG001_02668	FG013_09642	FU001_00231	fuGraFG1chr1G347000.1	FGSG_10397	FGRAMPH1_01T07999	Cluster 2	S+Cv	.	.	cyto	13.5	.	.	Non-effector	0.817	Trichodiene synthase (TRI5)	reduced virulence	Fusarium graminearum	Triticum aestivum	10.1128/AEM.02017-09
FG001_03139	FG013_08759	FU001_08286	fuGraFG1chr2G261700.1	FGSG_04309	FGRAMPH1_01T14975	Cluster 3	S	.	.	mito	19	.	.	Non-effector	0.956	Transketolase, pyrimidine binding domain	.	.	.	.
FG001_03251	FG013_12148	FU001_08175	fuGraFG1chr2G251400.1 ; FGSG_04206 ; FGSG_12290	FGSG_12291 ; FGSG_04206 ; FGSG_12290 ; FGSG_12292	FGRAMPH1_01T14729 ; FGRAMPH1_01T14735 ; FGRAMPH1_01T14733 ; FGRAMPH1_01T14727 ; FGRAMPH1_01T14731	Cluster 2	S+Cv	.	.	cyto	10.5	.	.	Non-effector	0.99	Glutathione-dependent formaldehyde-activating enzyme	.	.	.	.
FG001_03307	FG013_05286	FU001_08661	fuGraFG1chr2G246400.1	FGSG_04155	FGRAMPH1_01T14621	.	.	Cluster_1	.	mito	21	.	.	Non-effector	0.617	Uracil phosphoribosyltransferase	.	.	.	.
FG001_03644	FG013_05967	FU001_01022	fuGraFG1chr2G214300.1	FGSG_12369	FGRAMPH1_01T13859	.	.	.	FGSG_12369	.	.	chlo	10	Non-effector	0.956	Peroxidase	.	.	.	.
FG001_04614	FG013_02872 ; FG013_02875	FU001_02904 ; FU001_02905	fuGraFG1chr3G211700.1 ; FGSG_13879	FGSG_17487 ; FGSG_13879	FGRAMPH1_01T20955 ; FGRAMPH1_01T20953	Cluster 3	S	.	.	nucl	25	.	.	Non-effector	0.932	AMP-binding enzyme	.	.	.	.
FG001_04739	FG013_12331	FU001_02785	fuGraFG1chr3G223800.1	FGSG_11101	FGRAMPH1_01T21223	Cluster 3	S	.	FGSG_11101	.	.	chlo	10	Non-effector	0.987	.	.	.	.	.
FG001_06406	FG013_03271	.	fuGraFG1chr1G234300.1	FGSG_02273	FGRAMPH1_01T05485	Cluster 3	Cv	Cluster_4	.	cyto	18.5	.	.	Non-effector	0.975	Aldehyde dehydrogenase family	.	.	.	.
FG001_06786	FG013_04058	FU001_10319	fuGraFG1chr4G199700.1	FGSG_09522	FGRAMPH1_01T26885	Cluster 3	Cv	.	FGSG_09522	.	.	chlo	4	Non-effector	0.986	Common central domain of tyrosinase	.	.	.	.
FG001_06820	FG013_04023	FU001_10352	fuGraFG1chr4G203200.1	FGSG_09491	FGRAMPH1_01T26959	.	.	.	.	cyto_nucl	13.5	.	.	Non-effector	0.971	KH domain	.	.	.	.
FG001_07526	FG013_01408	FU001_02083	fuGraFG1chr3G128800.1	FGSG_05906	FGRAMPH1_01T19051	Cluster 1	S	.	FGSG_05906	.	.	vacu	4	Effector	0.646	Lipase (class 3)	reduced virulence	Fusarium graminearum	Triticum aestivum	10.1111/j.1365-313X.2005.02377.x
FG001_08105	FG013_05247	FU001_05263	fuGraFG1chr1G089400.1	FGSG_00863	FGRAMPH1_01T02165	Cluster 5	S	Cluster_4	.	mito	24.5	.	.	Non-effector	0.922	Insulinase (Peptidase family M16)	.	.	.	.
FG001_08221	FG013_10382	FU001_06528	fuGraFG1chr4G158300.1 ; fuGraFG1chr4G158200.1	FGSG_07907	FGRAMPH1_01T25953	Cluster 6	S+Cv	.	.	nucl	18.5	.	.	Non-effector	0.923	Haloacid dehalogenase-like hydrolase	.	.	.	.
FG001_08540	FG013_10027	FU001_07164	fuGraFG1chr4G128500.1	FGSG_07642	FGRAMPH1_01T25277	.	.	.	.	nucl	8	.	.	Non-effector	0.956	Pyridine nucleotide-disulphide oxidoreductase	.	.	.	.
FG001_08558	FG013_10012	FU001_07149	fuGraFG1chr4G126900.1	FGSG_07625	FGRAMPH1_01T25243	.	.	.	FGSG_07625	.	.	chlo	5	Non-effector	0.557	Glycosyl hydrolase family 62	.	.	.	.
FG001_08890	FG013_03548	FU001_02513	FGSG_02523	FGSG_02523	FGRAMPH1_01T06055	.	.	Cluster_1	.	cyto	15	.	.	Non-effector	0.74	Translationally controlled tumour protein	.	.	.	.
FG001_09359	FG013_04880	FU001_09189	fuGraFG1chr1G168700.1	FGSG_01643	FGRAMPH1_01T04011	.	.	.	.	cyto	11.5	.	.	Non-effector	0.722	Chorismate synthase	.	.	.	.
FG001_09577	FG013_05149	FU001_05356	fuGraFG1chr1G080700.1	FGSG_00781	FGRAMPH1_01T01961	Cluster 3	S	Cluster_4	.	cyto	11.5	.	.	Non-effector	0.66	JAB1/Mov34/MPN/PAD-1 ubiquitin protease	.	.	.	.
FG001_10366	FG013_01114	FU001_01801	FGSG_16613	FGSG_16613	FGRAMPH1_01T19677	.	.	.	.	nucl	22.5	.	.	Non-effector	0.968	PLD-like domain	.	.	.	.
FG001_10606	FG013_07341	FU001_10296	fuGraFG1chr2G081200.1	FGSG_16973	FGRAMPH1_01T10803	.	.	Cluster_5	.	cyto	24.5	.	.	Unlikely effector	0.518	Dienelactone hydrolase family	.	.	.	.
FG001_11048	FG013_08888	FU001_06322	fuGraFG1chr2G289700.1	FGSG_04583	FGRAMPH1_01T15633	Cluster 1	S+Cv	.	FGSG_04583	.	.	extr	14	Effector	0.822	.	.	.	.	.
FG001_12417	FG013_00881	FU001_11105	fuGraFG1chr3G178900.1	FGSG_06384	FGRAMPH1_01T20179	Cluster 3	S+Cv	.	.	nucl	11.5	.	.	Non-effector	0.99	Sec23/Sec24 trunk domain	.	.	.	.
FG001_12612	FG013_03091	FU001_03112	fuGraFG1chr3G191000.1	FGSG_10791	FGRAMPH1_01T20477	Cluster 6	S+Cv	.	.	nucl	18	.	.	Non-effector	0.922	DEAD/DEAH box helicase	.	.	.	.
FG001_12692	FG013_03170	FU001_03192	fuGraFG1chr3G183800.1	FGSG_10722	FGRAMPH1_01T20299	Cluster 3	Cv	Cluster_2	.	cyto	13.5	.	.	Non-effector	0.99	tRNA synthetases class I (I, L, M and V)	.	.	.	.
FG001_12809	FG013_10207	FU001_10579	fuGraFG1chr4G003900.1	FGSG_06480	FGRAMPH1_01T22385	.	.	.	.	cyto	16	.	.	Non-effector	0.543	Carbon-nitrogen hydrolase	.	.	.	.
FG001_00285	FG013_08075	FU001_04721	fuGraFG1chr4G085200.1	FGSG_07233	FGRAMPH1_01T24303	Cluster 3	S	.	.	nucl	16.5	.	.	Non-effector	0.705	Calcineurin-like phosphoesterase	lethal	Aspergillus fumigatus	Mus musculus	10.1371/journal.ppat.1005899
.	FG013_10431	FU001_10063	fuGraFG1chr4G167600.1	FGSG_09834	FGRAMPH1_01T26169	.	.	.	.	cyto	16	.	.	Non-effector	0.989	Thiamine pyrophosphate enzyme, N-terminal TPP binding domain	.	.	.	.
FG001_00224	FG013_08015	FU001_04785	FGSG_07292	FGSG_07292	FGRAMPH1_01T24443	Cluster 5	S	Cluster_5	.	nucl	13.5	.	.	Non-effector	0.514	Ribosomal protein L7Ae/L30e/S12e/Gadd45 family	.	.	.	.
FG001_00344	.	.	.	.	.	.	.	.	.	nucl	23	.	.	Effector	0.794	Ribosomal protein S14p/S29e	.	.	.	.
FG001_00708	FG013_06327	FU001_05790	fuGraFG1chr4G045200.1	FGSG_06875	FGRAMPH1_01T23387	.	.	.	.	mito	22.5	.	.	Non-effector	0.527	ATP synthase	.	.	.	.
FG001_00805	FG013_06735	FU001_05883	fuGraFG1chr4G035000.1	FGSG_06784	FGRAMPH1_01T23179	.	.	.	.	cyto	14	.	.	Non-effector	0.966	Polyprenyl synthetase	.	.	.	.
FG001_00960	FG013_06577	FU001_07315	fuGraFG1chr4G020900.1	FGSG_06646	FGRAMPH1_01T22817	Cluster 3	Cv	Cluster_4	FGSG_06646	.	.	cyto	4.5	Non-effector	0.574	ADP-ribosylation factor family	.	.	.	.
FG001_01081	FG013_11228	FU001_07208	fuGraFG1chr4G011000.1	FGSG_16677	FGRAMPH1_01T22577	Cluster 2	Cv	.	.	mito	24	.	.	Non-effector	0.971	Thiamine pyrophosphate enzyme, N-terminal TPP binding domain	.	.	.	.
FG001_01416	FG013_07213	FU001_06766	fuGraFG1chr2G125600.1 ; fuGraFG1chr2G125500.1	FGSG_03004 ; FGSG_03003	FGRAMPH1_01T11825 ; FGRAMPH1_01T11823	Cluster 1	Cv	.	FGSG_03003	.	.	chlo	7	Non-effector	0.955	Glycosyl hydrolases family 43	overexpressed or secreted during interaction with plant cell walls	Fusarium graminearum	Triticum aestivum	10.1002/pmic.200700184
FG001_01660	FG013_09564	FU001_11455	fuGraFG1chr2G147900.1	FGSG_12483	FGRAMPH1_01T12353	.	.	Cluster_4	.	cyto	15.5	.	.	Non-effector	0.587	Aldo/keto reductase family	.	.	.	.
FG001_01825	FG013_10113	FU001_00701	fuGraFG1chr2G163500.1	FGSG_03365	FGRAMPH1_01T12701	.	.	.	FGSG_03365	.	.	chlo	11	Effector	0.711	Endonuclease/Exonuclease/phosphatase family	.	.	.	.
FG001_01938	FG013_10965	FU001_09669	fuGraFG1chr2G173400.1	FGSG_03462	FGRAMPH1_01T12939	Cluster 2	S	.	FGSG_03462	.	.	cyto	11	Non-effector	0.956	Glycosyl hydrolases family 31	.	.	.	.
FG001_02118	FG013_05710	FU001_00792	fuGraFG1chr2G189500.1	FGSG_03628	FGRAMPH1_01T13329	Cluster 4	Cv	.	FGSG_03628	.	.	chlo	12	Non-effector	0.871	Glycosyl hydrolases family 6	.	.	.	.
FG001_02122	FG013_05714	FU001_00796	fuGraFG1chr2G189900.1	FGSG_03632	FGRAMPH1_01T13337	.	.	.	FGSG_03632	.	.	chlo	8	Non-effector	0.834	Glycosyl hydrolase family 61	.	.	.	.
FG001_02141	FG013_05733	FU001_00813	.	FGSG_03648	FGRAMPH1_01T13375	.	.	.	.	mito	15	.	.	Effector	0.6	short chain dehydrogenase	.	.	.	.
FG001_02311	FG013_06794	FU001_09299	fuGraFG1chr1G311600.1	FGSG_10075	FGRAMPH1_01T07223	.	.	Cluster_3	.	cyto_nucl	11.833	.	.	Non-effector	0.959	JAB1/Mov34/MPN/PAD-1 ubiquitin protease	.	.	.	.
FG001_02326	FG013_06000	FU001_09312	fuGraFG1chr1G312900.1	FGSG_10089	FGRAMPH1_01T07253	Cluster 1	S	.	FGSG_10089	.	.	vacu	10	Non-effector	0.951	Receptor L domain	reduced virulence	Fusarium graminearum	Triticum aestivum	10.1111/mpp.12742
FG001_02489	FG013_06164	FU001_00062	fuGraFG1chr1G330100.1	FGSG_10239	FGRAMPH1_01T07619	.	.	.	.	cyto	19.5	.	.	Non-effector	0.954	Protein phosphatase 2C	.	.	.	.
FG001_02520	FG013_06193	FU001_00091	FGSG_10264	FGSG_10264	FGRAMPH1_01T07679	.	.	.	.	mito	12	.	.	Non-effector	0.753	Glutamine synthetase, catalytic domain	.	.	.	.
FG001_02533	FG013_06206	FU001_00104	FGSG_10276	FGSG_10276	FGRAMPH1_01T07707	.	.	.	.	mito	26	.	.	Effector	0.615	NADH ubiquinone oxidoreductase, 20 Kd subunit	.	.	.	.
FG001_02617	FG013_12895	FU001_00184	fuGraFG1chr1G342200.1	FGSG_10352	FGRAMPH1_01T07895	Cluster 3	S	.	.	cyto	21	.	.	Non-effector	0.678	Cyclophilin type peptidyl-prolyl cis-trans isomerase/CLD	.	.	.	.
FG001_02977	FG013_13087	FU001_00551	fuGraFG1chr1G376100.1	FGSG_10675	FGRAMPH1_01T08675	.	.	.	FGSG_10675	.	.	chlo	10	Non-effector	0.651	SMP-30/Gluconolaconase/LRE-like region	.	.	.	.
FG001_03159	FG013_08739 ; FG013_00113	FU001_12543 ; FU001_08266	fuGraFG1chr2G259700.1	FGSG_05491 ; FGSG_04289	FGRAMPH1_01T18051 ; FGRAMPH1_01T14929	.	.	.	.	nucl	18	.	.	Non-effector	0.624	Centromere kinetochore component CENP-T histone fold	.	.	.	.
FG001_03206	FG013_08692	FU001_08218	fuGraFG1chr2G255300.1	FGSG_04243	FGRAMPH1_01T14825	Cluster 5	S	Cluster_4	.	cyto	13.5	.	.	Non-effector	0.706	Thiolase, N-terminal domain	.	.	.	.
FG001_03243	FG013_12140	FU001_08183	fuGraFG1chr2G252200.1	FGSG_04213	FGRAMPH1_01T14753	.	.	Cluster_1	FGSG_04213	.	.	extr	9	Effector	0.844	Alternaria alternata allergen 1	.	.	.	.
FG001_03256	FG013_12152	FU001_08170	fuGraFG1chr2G250900.1	FGSG_04202	FGRAMPH1_01T14719	Cluster 4	Cv	.	.	cyto	11.5	.	.	Non-effector	0.909	tRNA synthetase class II core domain (G, H, P, S and T)	.	.	.	.
FG001_03326	FG013_05304	FU001_08680	fuGraFG1chr2G244400.1	FGSG_04137	FGRAMPH1_01T14579	Cluster 3	Cv	Cluster_1	.	mito	18.5	.	.	Non-effector	0.689	Ribosomal protein L32	.	.	.	.
FG001_03481	FG013_05463	FU001_01184	fuGraFG1chr2G228700.1	FGSG_16171	FGRAMPH1_01T14207	.	.	Cluster_2	.	cyto	19	.	.	Non-effector	0.987	HMGL-like	.	.	.	.
FG001_03810	FG013_00150	FU001_12398	fuGraFG1chr3G079000.1	FGSG_16487	FGRAMPH1_01T17963	.	.	.	.	nucl	18	.	.	Non-effector	0.974	SAPK-interacting protein 1 (Sin1), middle CRIM domain	.	.	.	.
FG001_03816	FG013_00156	FU001_12393	fuGraFG1chr3G078500.1	FGSG_05454	FGRAMPH1_01T17949	Cluster 2	S	.	.	mito	26.5	.	.	Non-effector	0.695	Dehydrogenase E1 component	.	.	.	.
FG001_03842	FG013_00181	FU001_07987	fuGraFG1chr3G076200.1	FGSG_05431	FGRAMPH1_01T17899	Cluster 1	Cv	.	.	nucl	16	.	.	Non-effector	0.99	Phenylalanyl tRNA synthetase beta chain CLM domain	.	.	.	.
FG001_04010	FG013_00347	FU001_12147	fuGraFG1chr3G060700.1	FGSG_05282	FGRAMPH1_01T17525	Cluster 2	Cv	.	.	nucl	16.5	.	.	Non-effector	0.625	RHO protein GDP dissociation inhibitor	.	.	.	.
FG001_04057	FG013_00394	FU001_12723	fuGraFG1chr3G056300.1	FGSG_05236	FGRAMPH1_01T17433	.	.	.	.	cyto	13	.	.	Non-effector	0.949	Peptidase family M3	.	.	.	.
FG001_04101	FG013_00437	FU001_11639	fuGraFG1chr3G052300.1	FGSG_05198	FGRAMPH1_01T17343	.	.	.	.	mito	27	.	.	Non-effector	0.949	Molybdopterin oxidoreductase	.	.	.	.
FG001_04134	FG013_00472	FU001_11674	fuGraFG1chr3G049600.1	FGSG_05169	FGRAMPH1_01T17265	.	.	.	.	nucl	12	.	.	Non-effector	0.97	Aminotransferase class I and II	.	.	.	.
FG001_04177	FG013_00515	FU001_12457	FGSG_05132	FGSG_05132	FGRAMPH1_01T17177	.	.	.	.	cyto	18.5	.	.	Non-effector	0.824	Haloacid dehalogenase-like hydrolase	.	.	.	.
FG001_04179	FG013_00517	FU001_12458	fuGraFG1chr3G045500.1	FGSG_05130	FGRAMPH1_01T17173	.	.	.	.	cyto	20.5	.	.	Non-effector	0.602	Oxidoreductase family, NAD-binding Rossmann fold	.	.	.	.
FG001_04180	FG013_00518	FU001_12459	fuGraFG1chr3G045400.1	FGSG_05128	FGRAMPH1_01T17169	Cluster 2	Cv	Cluster_4	.	cyto	22	.	.	Non-effector	0.559	Dihydrodipicolinate synthetase family	.	.	.	.
FG001_04420	FG013_00762	FU001_07959	fuGraFG1chr3G023900.1	FGSG_04914	FGRAMPH1_01T16625	.	.	.	.	mito	10	.	.	Non-effector	0.713	Ribosomal protein S30	.	.	.	.
FG001_04571	FG013_02919	FU001_02949	fuGraFG1chr3G207600.1	FGSG_10942	FGRAMPH1_01T20855	Cluster 2	S	Cluster_1	.	mito	14.5	.	.	Effector	0.598	Ribosomal protein S26e	.	.	.	.
FG001_04832	FG013_08461	FU001_11195	fuGraFG1chr3G232400.1	FGSG_11184	FGRAMPH1_01T21423	.	.	.	FGSG_11184	.	.	chlo	9	Non-effector	0.593	Cellulase (glycosyl hydrolase family 5)	.	.	.	.
FG001_05223	FG013_12932	FU001_05493	fuGraFG1chr3G267800.1	.	FGRAMPH1_01T22249	.	.	.	.	extr	26	.	.	Effector	0.573	Glycosyl hydrolase family 62	.	.	.	.
FG001_05233	FG013_01629	FU001_11765	fuGraFG1chr2G074500.1	FGSG_08722	FGRAMPH1_01T10659	Cluster 3	S+Cv	.	.	cyto	13	.	.	Non-effector	0.971	Staphylococcal nuclease homologue	unaffected pathogenicity	Fusarium graminearum	Triticum aestivum	10.1371/journal.ppat.1002310
FG001_05415	FG013_01810	FU001_01582	fuGraFG1chr2G056700.1	FGSG_08560	FGRAMPH1_01T10263	.	.	Cluster_1	.	nucl	18	.	.	Non-effector	0.88	NAC domain	.	.	.	.
FG001_05436	FG013_01832	FU001_01561	fuGraFG1chr2G054800.1	FGSG_08543	FGRAMPH1_01T10219	Cluster 5	S+Cv	.	.	cyto	22	.	.	Non-effector	0.987	AMP-binding enzyme	.	.	.	.
FG001_05650	FG013_02045	FU001_01332	fuGraFG1chr2G035400.1	FGSG_08350	FGRAMPH1_01T09731	.	.	.	.	mito	22.5	.	.	Non-effector	0.922	Serine hydroxymethyltransferase	.	.	.	.
FG001_05767	FG013_02160	FU001_04639	fuGraFG1chr2G025400.1	FGSG_08253	FGRAMPH1_01T09481	Cluster 2	Cv	.	FGSG_08253	.	.	extr	9	Unlikely effector	0.511	Glycosyl hydrolase family 7	.	.	.	.
FG001_05905	FG013_03814	FU001_10635	fuGraFG1chr1G190100.1	FGSG_01857	FGRAMPH1_01T04497	Cluster 3	S	.	.	mito	11	.	.	Non-effector	0.534	Enoyl-(Acyl carrier protein) reductase	.	.	.	.
FG001_06109	FG013_08295	FU001_08593	fuGraFG1chr1G208200.1	FGSG_02030	FGRAMPH1_01T04903	.	.	Cluster_3	.	mito	20.5	.	.	Effector	0.662	CoA binding domain	.	.	.	.
FG001_06138	FG013_08266	FU001_08567	fuGraFG1chr1G210900.1	FGSG_02059	FGRAMPH1_01T04967	.	.	.	FGSG_02059	.	.	extr	8	Non-effector	0.845	Alpha galactosidase A	.	.	.	.
FG001_06321	FG013_03189	FU001_11435	fuGraFG1chr1G226700.1	FGSG_02204	FGRAMPH1_01T05315	.	.	Cluster_2	FGSG_02204	.	.	chlo	8	Non-effector	0.99	Serine carboxypeptidase S28	.	.	.	.
FG001_06806	FG013_04037	FU001_10338	FGSG_09503	FGSG_09503	FGRAMPH1_01T26927	.	.	.	.	cyto	26	.	.	Non-effector	0.669	Thiolase, N-terminal domain	.	.	.	.
FG001_07239	FG013_10666	FU001_10444	fuGraFG1chr3G101000.1	FGSG_05663	FGRAMPH1_01T18451	Cluster 4	Cv	Cluster_5	FGSG_05663	.	.	cyto	8.5	Effector	0.571	Polysaccharide deacetylase	.	.	.	.
FG001_07275	FG013_10635	FU001_10478	fuGraFG1chr3G104200.1	FGSG_05690	FGRAMPH1_01T18521	Cluster 1	S+Cv	.	.	mito	14	.	.	Non-effector	0.652	Zinc-binding dehydrogenase	.	.	.	.
FG001_07302	FG013_10608	.	fuGraFG1chr3G106700.1	FGSG_05713	FGRAMPH1_01T18573	.	.	.	.	cyto	20.5	.	.	Non-effector	0.989	Threonine synthase N terminus	.	.	.	.
FG001_07536	FG013_01398	FU001_02075	fuGraFG1chr3G129800.1	FGSG_05916	FGRAMPH1_01T19069	.	.	Cluster_1	.	nucl	21	.	.	Effector	0.669	Ribosomal L38e protein family	.	.	.	.
FG001_07674	FG013_11012	FU001_05237	fuGraFG1chr1G130300.1	FGSG_01248	FGRAMPH1_01T03087	Cluster 5	S	.	.	cyto	16	.	.	Non-effector	0.969	tRNA synthetase class II core domain (G, H, P, S and T)	.	.	.	.
FG001_07689	FG013_12282	FU001_12345	fuGraFG1chr1G129300.1	FGSG_01238	FGRAMPH1_01T03063	.	.	.	.	mito	15	.	.	Non-effector	0.736	Ribosomal protein L36e	.	.	.	.
FG001_07935	FG013_09350	FU001_06187	fuGraFG1chr1G107100.1	FGSG_01017	FGRAMPH1_01T02551	.	.	.	.	cyto	17.5	.	.	Non-effector	0.914	Peptidase family M49	.	.	.	.
FG001_07990	FG013_11849	FU001_09580	fuGraFG1chr1G101200.1	FGSG_00969	FGRAMPH1_01T02433	.	.	.	.	cyto	22	.	.	Non-effector	0.934	AICARFT/IMPCHase bienzyme	.	.	.	.
FG001_08097	FG013_05255	FU001_05255	FGSG_00871	FGSG_00871	FGRAMPH1_01T02181	.	.	.	.	mito	13	.	.	Non-effector	0.715	Pyridine nucleotide-disulphide oxidoreductase	.	.	.	.
FG001_08106	FG013_05245	FU001_05264	fuGraFG1chr1G089300.1 ; FGSG_00862	FGSG_00862 ; FGSG_00861	FGRAMPH1_01T02163 ; FGRAMPH1_01T02161	Cluster 3	S+Cv	Cluster_3	.	cyto	20	.	.	Non-effector	0.991	IMP dehydrogenase / GMP reductase domain	.	.	.	.
FG001_08380	FG013_12099 ; FG013_12100	FU001_06679	fuGraFG1chr4G143400.1	.	FGRAMPH1_01T25625	.	.	.	.	extr	17	.	.	Non-effector	0.893	Cutinase	.	.	.	.
FG001_08664	FG013_09904	FU001_07017	fuGraFG1chr4G116800.1	FGSG_16843	FGRAMPH1_01T25027	.	.	.	.	mito	7	.	.	Non-effector	0.947	GMC oxidoreductase	.	.	.	.
FG001_08915	FG013_03573	FU001_02534	fuGraFG1chr1G261700.1	FGSG_02544	FGRAMPH1_01T06107	.	.	.	.	nucl	21.5	.	.	Non-effector	0.975	Eukaryotic translation initiation factor 3 subunit 8 N-terminus	.	.	.	.
FG001_09050	FG013_07813	FU001_02670	fuGraFG1chr1G273900.1	FGSG_02668	FGRAMPH1_01T06395	Cluster 4	S+Cv	.	.	nucl	11.5	.	.	Non-effector	0.957	Animal haem peroxidase	involved in SA defense	Fusarium graminearum	Triticum aestivum	10.1038/srep46129
FG001_09162	FG013_07919	FU001_11718	fuGraFG1chr1G285200.1	FGSG_02764	FGRAMPH1_01T06633	.	.	.	.	cyto	21	.	.	Non-effector	0.659	Protein of unknown function (DUF933)	.	.	.	.
FG001_09193	FG013_12794	FU001_11689	fuGraFG1chr1G287800.1 ; FGSG_11602	FGSG_11602 ; FGSG_11597	FGRAMPH1_01T06693 ; FGRAMPH1_01T06691	Cluster 3	S	Cluster_2	.	cyto	12.5	.	.	Non-effector	0.95	ATPase family associated with various cellular activities (AAA)	.	.	.	.
FG001_09557	FG013_05167	FU001_05341	fuGraFG1chr1G082800.1	FGSG_00798	FGRAMPH1_01T02001	Cluster 5	S	.	.	cyto_nucl	14.166	.	.	Effector	0.657	Ribosomal protein S21e	.	.	.	.
FG001_09641	FG013_05087	FU001_05417	FGSG_00722	FGSG_00722	FGRAMPH1_01T01831	.	.	.	.	cyto	14.5	.	.	Effector	0.555	Phosphoribosyl transferase domain	.	.	.	.
FG001_09716	FG013_05010	FU001_05489	fuGraFG1chr1G066800.1	FGSG_00655	FGRAMPH1_01T01651	.	.	.	.	cyto	21.5	.	.	Non-effector	0.631	Alcohol dehydrogenase GroES-like domain	.	.	.	.
FG001_09853	FG013_04275	FU001_11324	fuGraFG1chr4G227400.1	FGSG_09284	FGRAMPH1_01T27473	.	.	.	.	cyto	19.5	.	.	Non-effector	0.731	Homoserine dehydrogenase	.	.	.	.
FG001_09883	FG013_04305	FU001_12877	fuGraFG1chr4G230900.1	FGSG_09257	FGRAMPH1_01T27539	.	.	.	.	cyto	24.5	.	.	Non-effector	0.902	Enolase C-terminal domain-like	.	.	.	.
FG001_10236	FG013_00983	FU001_10939	fuGraFG1chr3G170000.1	FGSG_06290	FGRAMPH1_01T19959	Cluster 5	S+Cv	Cluster_2	.	cyto_nucl	13	.	.	Non-effector	0.92	Serine hydroxymethyltransferase	.	.	.	.
FG001_10489	FG013_01229	FU001_01921	fuGraFG1chr3G145600.1	FGSG_06071	FGRAMPH1_01T19417	.	.	.	.	nucl	23.5	.	.	Non-effector	0.924	ARID/BRIGHT DNA binding domain	reduced virulence	Fusarium graminearum	Triticum aestivum	10.1371/journal.ppat.1002310
FG001_10546	FG013_01285	FU001_01972	FGSG_06020	FGSG_06020	FGRAMPH1_01T19303	Cluster 5	S	Cluster_1	.	nucl	9.5	.	.	Effector	0.688	S25 ribosomal protein	.	.	.	.
FG001_10816	FG013_07539	FU001_12021	FGSG_08941	FGSG_08941	FGRAMPH1_01T11241	Cluster 3	S+Cv	Cluster_5	.	cyto	22.5	.	.	Non-effector	0.58	Aldo/keto reductase family	.	.	.	.
FG001_11049	FG013_08887	FU001_06323	fuGraFG1chr2G289600.1	FGSG_04582	FGRAMPH1_01T15631	Cluster 3	S+Cv	.	.	cyto	10.5	.	.	Non-effector	0.95	tRNA synthetases class I (E and Q), catalytic domain	.	.	.	.
FG001_11077	FG013_08859	FU001_06351	fuGraFG1chr2G286900.1	FGSG_04554	FGRAMPH1_01T15571	Cluster 2	S	.	.	cyto	10.5	.	.	Non-effector	0.989	tRNA synthetases class II (D, K and N)	unaffected pathogenicity	Fusarium graminearum	Triticum aestivum	10.1371/journal.ppat.1002310
FG001_11153	FG013_11122	.	fuGraFG1chr2G280200.1	FGSG_04485	FGRAMPH1_01T15415	Cluster 2	Cv	.	.	cyto	13	.	.	Non-effector	0.96	Actin	.	.	.	.
FG001_11242	FG013_02488	FU001_03918	fuGraFG1chr1G030400.1	FGSG_00300	FGRAMPH1_01T00803	Cluster 1	S+Cv	.	.	mito	21	.	.	Non-effector	0.516	ATP synthase delta (OSCP) subunit	.	.	.	.
FG001_11300	FG013_02545	FU001_03531	fuGraFG1chr1G035300.1	FGSG_00346	FGRAMPH1_01T00919	.	.	.	.	cyto	16.5	.	.	Non-effector	0.805	Saccharopine dehydrogenase C-terminal domain	.	.	.	.
FG001_11499	FG013_09139	FU001_04449	fuGraFG1chr2G010100.1	FGSG_08078	FGRAMPH1_01T09065	Cluster 2	S	.	.	cyto	15	.	.	Non-effector	0.989	Amidase	.	.	.	.
FG001_11634	FG013_11053	FU001_05200	fuGraFG1chr1G134100.1 ; fuGraFG1chr1G134000.1	FGSG_01280 ; FGSG_01279	FGRAMPH1_01T03171 ; FGRAMPH1_01T03169	.	.	.	.	cyto_nucl	11	.	.	Non-effector	0.971	Glucose-6-phosphate dehydrogenase, C-terminal domain	.	.	.	.
FG001_11671	FG013_12969	FU001_05164	FGSG_01314	FGSG_01314	FGRAMPH1_01T03251	Cluster 2	Cv	Cluster_2	.	cyto_nucl	15.166	.	.	Non-effector	0.938	Eukaryotic translation initiation factor 3 subunit 7 (eIF-3)	.	.	.	.
FG001_11811	FG013_06947	FU001_11040	fuGraFG1chr1G295800.1	FGSG_09934	FGRAMPH1_01T06867	Cluster 3	Cv	.	.	cyto	10.5	.	.	Non-effector	0.954	Asparagine synthase	.	.	.	.
FG001_11854	FG013_06989	FU001_11000	fuGraFG1chr1G291600.1	FGSG_09893	FGRAMPH1_01T06779	.	.	Cluster_2	.	cyto	22.5	.	.	Non-effector	0.979	Peptidase family M20/M25/M40	.	.	.	.
FG001_11876	FG013_02253	FU001_03688	fuGraFG1chr1G010800.1	FGSG_00096	FGRAMPH1_01T00281	.	.	Cluster_2	.	extr	10	.	.	Non-effector	0.956	Glycosyl hydrolases family 2 TIM barrel domain	.	.	.	.
FG001_12062	FG013_02314	FU001_03747	fuGraFG1chr1G016000.1	FGSG_00150	FGRAMPH1_01T00405	.	.	Cluster_1	.	cyto	21	.	.	Non-effector	0.526	Zinc-binding dehydrogenase	.	.	.	.
FG001_12090	FG013_02347	FU001_03776	fuGraFG1chr1G018400.1	FGSG_00175	FGRAMPH1_01T00477	Cluster 4	Cv	.	.	mito	24	.	.	Non-effector	0.922	Citrate synthase, C-terminal domain	.	.	.	.
FG001_12261	FG013_02735	.	FGSG_00524	FGSG_00524	FGRAMPH1_01T01339	Cluster 3	S+Cv	.	.	cyto	15	.	.	Non-effector	0.937	UTP--glucose-1-phosphate uridylyltransferase	.	.	.	.
FG001_12296	FG013_02699	FU001_03375	fuGraFG1chr1G049500.1	FGSG_00490	FGRAMPH1_01T01255	Cluster 2	Cv	.	.	mito	23.5	.	.	Non-effector	0.966	Aldehyde dehydrogenase family	.	.	.	.
FG001_12409	FG013_00874	FU001_11097	FGSG_06392	FGSG_06392	FGRAMPH1_01T20195	Cluster 2	S	.	.	cyto	21.5	.	.	Non-effector	0.598	Profilin	.	.	.	.
FG001_12434	FG013_00897	FU001_11124	FGSG_06367	FGSG_06367	FGRAMPH1_01T20143	Cluster 2	Cv	.	.	extr	13	.	.	Non-effector	0.951	.	.	.	.	.
FG001_12513	FG013_11344	FU001_07775	fuGraFG1chr3G005600.1	FGSG_04741	FGRAMPH1_01T16209	.	.	Cluster_1	FGSG_04741	.	.	chlo	13	Effector	0.594	Alternaria alternata allergen 1	.	.	.	.
FG001_12613	FG013_03092	FU001_03113	fuGraFG1chr3G190900.1	FGSG_10790	FGRAMPH1_01T20475	Cluster 2	S	.	.	cysk	21	.	.	Non-effector	0.968	Acyl-CoA dehydrogenase, C-terminal domain	.	.	.	.
FG001_12821	FG013_10196	FU001_10593	fuGraFG1chr4G003200.1	FGSG_06469	FGRAMPH1_01T22349	.	.	.	FGSG_06469	.	.	extr	6	Non-effector	0.879	.	.	.	.	.
FG001_12935	FG013_00961	FU001_10958	FGSG_06309	FGSG_06309	FGRAMPH1_01T20005	.	.	Cluster_4	.	mito	8	.	.	Non-effector	0.989	CBS domain	.	.	.	.
FG001_07104	FG013_00059	FU001_09970	fuGraFG1chr3G088400.1	FGSG_05541	FGRAMPH1_01T18163	.	.	.	.	cyto	18	.	.	Non-effector	0.99	Indole-3-glycerol phosphate synthase	.	.	.	.
FG001_04626	FG013_02861	FU001_02893	fuGraFG1chr3G212700.1	FGSG_10999	FGRAMPH1_01T20977	Cluster 1	Cv	.	FGSG_10999	.	.	chlo	6	Effector	0.865	Glycosyl hydrolases family 11	overexpressed or secreted during interaction with plant cell walls	Fusarium graminearum	Triticum aestivum	10.1002/pmic.200700184
.	FG013_03020	FU001_03041	fuGraFG1chr3G198000.1	FGSG_10856	FGRAMPH1_01T20641	.	.	.	.	cyto_nucl	10.5	.	.	Non-effector	0.692	Actin	.	.	.	.
FG001_09517	FG013_04725	FU001_12680	fuGraFG1chr1G155200.1	FGSG_01504	FGRAMPH1_01T03683	Cluster 3	Cv	Cluster_1	.	mito	15	.	.	Non-effector	0.585	Ribosomal protein L31e	.	.	.	.
FG001_00318	FG013_07566	FU001_04688	fuGraFG1chr4G082700.1	FGSG_07206	FGRAMPH1_01T24229	Cluster 6	S+Cv	.	.	nucl	12.5	.	.	Non-effector	0.956	DKCLD (NUC011) domain	.	.	.	.
FG001_05416 ; FG001_05414 ; FG001_05415	FG013_01812 ; FG013_01809 ; FG013_01810	FU001_01582	fuGraFG1chr2G056800.1 ; fuGraFG1chr2G056700.1	FGSG_08561 ; FGSG_08560	FGRAMPH1_01T10261 ; FGRAMPH1_01T10265 ; FGRAMPH1_01T10263	Cluster 4	S+Cv	Cluster_1	.	cyto	16	.	.	Non-effector	0.971	Ribosomal protein L14	.	.	.	.
.	.	FU001_03340	.	.	.	.	.	.	.	nucl	17.5	.	.	Effector	0.712	.	.	.	.	.
FG001_01079	FG013_11226 ; FG013_11268	FU001_07210 ; FU001_10163	fuGraFG1chr4G011200.1	FGSG_16678	FGRAMPH1_01T22581	.	.	.	.	nucl	18.5	.	.	Non-effector	0.987	Est1 DNA/RNA binding domain	.	.	.	.
FG001_04414	FG013_00753	FU001_07968	FGSG_04922	FGSG_04922	FGRAMPH1_01T16647	.	.	Cluster_1	.	cyto	20.5	.	.	Non-effector	0.693	Alcohol dehydrogenase GroES-like domain	.	.	.	.
FG001_00005	FG013_08631	FU001_06962	fuGraFG1chr4G111700.1	FGSG_07477	FGRAMPH1_01T24907	Cluster 3	Cv	Cluster_3	.	cyto	12	.	.	Non-effector	0.984	GTP cyclohydrolase N terminal	.	.	.	.
FG001_00015	FG013_08621	FU001_06953	fuGraFG1chr4G110800.1	FGSG_07468	FGRAMPH1_01T24889	.	.	.	.	cyto	14.5	.	.	Non-effector	0.922	D-isomer specific 2-hydroxyacid dehydrogenase, NAD binding domain	.	.	.	.
FG001_00016	FG013_08619	FU001_06952	fuGraFG1chr4G110700.1	FGSG_07467	FGRAMPH1_01T24887	.	.	.	.	nucl	15.5	.	.	Non-effector	0.99	Nucleosome assembly protein (NAP)	.	.	.	.
FG001_00070	FG013_08567	FU001_04937	fuGraFG1chr4G106100.1	FGSG_07419	FGRAMPH1_01T24775	.	.	Cluster_1	.	plas	21	.	.	Non-effector	0.712	TB2/DP1, HVA22 family	.	.	.	.
FG001_00181	FG013_07972	FU001_04826	fuGraFG1chr4G095500.1	FGSG_07331	FGRAMPH1_01T24541	Cluster 6	S+Cv	Cluster_4	.	extr	11	.	.	Non-effector	0.54	Eukaryotic porin	.	.	.	.
FG001_00183	FG013_07974	FU001_04823	fuGraFG1chr4G095400.1	FGSG_07329	FGRAMPH1_01T24535	Cluster 2	S	Cluster_3	.	nucl	17	.	.	Non-effector	0.896	Protein kinase domain	loss of pathogenicity	Fusarium graminearum	Triticum aestivum	10.1038/srep08504
FG001_00229	FG013_08020	FU001_04780	fuGraFG1chr4G090800.1	FGSG_13111	FGRAMPH1_01T24433	.	.	.	.	mito	10.5	.	.	Unlikely effector	0.515	Enoyl-CoA hydratase/isomerase	.	.	.	.
FG001_00236	FG013_08027	FU001_04773 ; FU001_04772	fuGraFG1chr4G090200.1 ; fuGraFG1chr4G090100.1 ; fuGraFG1chr4G090000.1	FGSG_13110 ; FGSG_13109 ; FGSG_07282	FGRAMPH1_01T24419 ; FGRAMPH1_01T24417 ; FGRAMPH1_01T24415	Cluster 2	S	.	.	cyto	14	.	.	Non-effector	0.991	Proteasome subunit	.	.	.	.
FG001_00244	FG013_08035	FU001_04764	fuGraFG1chr4G089300.1	FGSG_07274	FGRAMPH1_01T24399	Cluster 5	S	.	.	cyto	11.5	.	.	Non-effector	0.928	Glycosyl hydrolase family 1	.	.	.	.
FG001_00282	FG013_08072	FU001_04724	FGSG_07237	FGSG_07237	FGRAMPH1_01T24313	Cluster 3	S+Cv	.	.	cyto_nucl	11.5	.	.	Non-effector	0.956	PCI domain	.	.	.	.
FG001_00343	FG013_07590	FU001_04661	FGSG_07182	FGSG_07182	FGRAMPH1_01T24167	Cluster 3	S	.	.	mito	21	.	.	Non-effector	0.878	Elongation factor Tu GTP binding domain	.	.	.	.
FG001_00345	FG013_07592	FU001_04659	fuGraFG1chr4G079600.1	FGSG_07180	FGRAMPH1_01T24163	.	.	.	.	extr	15	.	.	Non-effector	0.644	Thioredoxin	.	.	.	.
FG001_00356	FG013_07602	FU001_04648	fuGraFG1chr4G078600.1	FGSG_07172	FGRAMPH1_01T24141	.	.	.	.	cyto_nucl	13.333	.	.	Non-effector	0.941	Dynamin central region	.	.	.	.
FG001_00393	FG013_07636	FU001_04226	fuGraFG1chr4G074900.1	FGSG_07141	FGRAMPH1_01T24061	Cluster 3	S	Cluster_1	.	plas	11	.	.	Non-effector	0.94	Armadillo/beta-catenin-like repeat	.	.	.	.
FG001_00417	FG013_07660	FU001_04203	fuGraFG1chr4G072600.1	FGSG_07122	FGRAMPH1_01T24015	.	.	.	.	nucl	20	.	.	Non-effector	0.949	PCI domain	.	.	.	.
FG001_00429	FG013_07673	FU001_04191	fuGraFG1chr4G071700.1	FGSG_07113	FGRAMPH1_01T23989	.	.	.	.	cyto	18.5	.	.	Non-effector	0.55	Eukaryotic phosphomannomutase	.	.	.	.
FG001_00442	FG013_07686	FU001_04178	fuGraFG1chr4G070400.1	FGSG_07101	FGRAMPH1_01T23963	.	.	.	.	nucl	10.5	.	.	Non-effector	0.971	ABC transporter	.	.	.	.
FG001_00501	FG013_06533	FU001_04125	FGSG_07054	FGSG_07054	FGRAMPH1_01T23845	Cluster 1	S	.	.	nucl	11.5	.	.	Non-effector	0.713	Arp2/3 complex, 34 kD subunit p34-Arc	.	.	.	.
FG001_00587	FG013_06446	FU001_04042	fuGraFG1chr4G057700.1	FGSG_06979	FGRAMPH1_01T23661	.	.	.	.	cysk	24	.	.	Non-effector	0.759	KH domain	.	.	.	.
FG001_00609	FG013_06424	FU001_04021	fuGraFG1chr4G055000.1	FGSG_06958	FGRAMPH1_01T23605	Cluster 3	S	.	.	cyto	14.5	.	.	Non-effector	0.989	Anticodon binding domain	.	.	.	.
FG001_00644	FG013_06390	FU001_03985	fuGraFG1chr4G051400.1	FGSG_06927	FGRAMPH1_01T23515	Cluster 6	S+Cv	Cluster_2	.	cyto	14.5	.	.	Non-effector	0.899	eRF1 domain 2	.	.	.	.
FG001_00703	FG013_06331	FU001_05787	fuGraFG1chr4G045600.1	FGSG_06878	FGRAMPH1_01T23395	Cluster 4	Cv	.	.	nucl	12.5	.	.	Non-effector	0.84	Protein kinase domain	reduced virulence	Fusarium graminearum	Triticum aestivum	10.1371/journal.ppat.1002460
FG001_00738	FG013_06300	FU001_05818	fuGraFG1chr4G042200.1	FGSG_06850	FGRAMPH1_01T23329	.	.	Cluster_3	.	cyto	19	.	.	Non-effector	0.989	tRNA synthetases class I (I, L, M and V)	.	.	.	.
FG001_00766	FG013_06774	FU001_05845	fuGraFG1chr4G039200.1	FGSG_06822	FGRAMPH1_01T23269	Cluster 5	S	.	.	cyto	13.5	.	.	Non-effector	0.99	Glycogen synthase	unaffected pathogenicity	Fusarium oxysporum	Galleria mellonella	10.1016/j.fgb.2015.03.014
FG001_00776	FG013_06764	FU001_05854	FGSG_06813	FGSG_06813	FGRAMPH1_01T23249	Cluster 2	S+Cv	.	.	mito	21.5	.	.	Non-effector	0.54	3-hydroxyacyl-CoA dehydrogenase, NAD binding domain	.	.	.	.
FG001_00785	FG013_06755	FU001_05864	FGSG_06804	FGSG_06804	FGRAMPH1_01T23225	Cluster 1	Cv	.	.	cyto_nucl	12.5	.	.	Non-effector	0.787	DEAD/DEAH box helicase	.	.	.	.
FG001_00828	FG013_06710	FU001_05912	FGSG_06761	FGSG_06761	FGRAMPH1_01T23117	Cluster 1	S	.	.	cyto	23.5	.	.	Non-effector	0.956	TCP-1/cpn60 chaperonin family	.	.	.	.
FG001_00841	FG013_06697	FU001_05926	fuGraFG1chr4G032100.1	FGSG_06752	FGRAMPH1_01T23087	Cluster 3	S	.	.	cyto	21.5	.	.	Non-effector	0.95	Aldehyde dehydrogenase family	.	.	.	.
FG001_00849	FG013_06689	FU001_05935	fuGraFG1chr4G031300.1	FGSG_06744	FGRAMPH1_01T23069	Cluster 2	S	.	.	cyto	12.5	.	.	Non-effector	0.684	alpha/beta hydrolase fold	.	.	.	.
FG001_00894	FG013_06644	FU001_05981	fuGraFG1chr4G026700.1	FGSG_06706	FGRAMPH1_01T22963	Cluster 5	S+Cv	Cluster_3	.	nucl	15.5	.	.	Non-effector	0.936	Nuclear transport factor 2 (NTF2) domain	.	.	.	.
FG001_00920	FG013_06619	FU001_07358	fuGraFG1chr4G024200.1	FGSG_06681	FGRAMPH1_01T22905	Cluster 1	S	.	.	mito	19.5	.	.	Effector	0.57	Putative esterase	.	.	.	.
FG001_00926	FG013_06613	FU001_07352	fuGraFG1chr4G023600.1	FGSG_06675	FGRAMPH1_01T22893	.	.	.	.	cyto	26.5	.	.	Non-effector	0.668	Isocitrate/isopropylmalate dehydrogenase	.	.	.	.
FG001_00949	FG013_06589	FU001_07327	fuGraFG1chr4G021700.1	FGSG_06655	FGRAMPH1_01T22843	Cluster 1	Cv	.	.	cyto	14.5	.	.	Non-effector	0.987	Aminopeptidase I zinc metalloprotease (M18)	.	.	.	.
FG001_01055	FG013_11203	FU001_07229	FGSG_06576	FGSG_06576	FGRAMPH1_01T22627	Cluster 3	Cv	.	.	nucl	11	.	.	Non-effector	0.989	tRNA synthetases class I (R)	.	.	.	.
FG001_01068	FG013_11216	FU001_07220	fuGraFG1chr4G012100.1	FGSG_12937	FGRAMPH1_01T22601	Cluster 5	S	.	.	nucl	15	.	.	Non-effector	0.836	Cofilin/tropomyosin-type actin-binding protein	.	.	.	.
FG001_01097	FG013_11244	FU001_07197	fuGraFG1chr4G009800.1	FGSG_06544	FGRAMPH1_01T22543	Cluster 3	S+Cv	.	.	cyto	22	.	.	Non-effector	0.969	Pyridoxal-phosphate dependent enzyme	.	.	.	.
FG001_01166	FG013_09770	FU001_11869	fuGraFG1chr2G102600.1	FGSG_02783	FGRAMPH1_01T11303	Cluster 2	S+Cv	.	.	cyto	9	.	.	Non-effector	0.694	Sterol methyltransferase C-terminal	.	.	.	.
FG001_01244	FG013_09845	FU001_06923	fuGraFG1chr2G109100.1	FGSG_02851	FGRAMPH1_01T11459	.	.	.	.	extr	13	.	.	Non-effector	0.8	Fumarylacetoacetate (FAA) hydrolase family	.	.	.	.
FG001_01261	FG013_09862	FU001_06907	fuGraFG1chr2G110800.1	FGSG_02866	FGRAMPH1_01T11497	.	.	.	FGSG_02866	.	.	chlo	5	Non-effector	0.935	Glycosyl Hydrolase Family 88	.	.	.	.
FG001_01447	FG013_07183	FU001_06738	fuGraFG1chr2G128400.1	FGSG_03027	FGRAMPH1_01T11883	Cluster 2	S	.	FGSG_03027	.	.	chlo	10	Non-effector	0.949	Peptidase family M28	.	.	.	.
FG001_01615	FG013_09607	FU001_09372	FGSG_03180	FGSG_03180	FGRAMPH1_01T12245	Cluster 1	S	Cluster_4	.	cyto	15	.	.	Unlikely effector	0.537	AhpC/TSA family	involved in ROS defence	Fusarium graminearum	.	10.1534/g3.116.027987
FG001_01636	FG013_09587	FU001_09351	FGSG_16309	FGSG_16309	FGRAMPH1_01T12297	Cluster 5	S	.	.	cyto_nucl	9.5	.	.	Non-effector	0.989	FAD binding domain	.	.	.	.
FG001_01715	FG013_09510	FU001_11507	fuGraFG1chr2G153000.1	FGSG_03269	FGRAMPH1_01T12467	Cluster 4	S	.	.	cyto	11.5	.	.	Non-effector	0.941	Glycosyl hydrolases family 2 TIM barrel domain	.	.	.	.
FG001_02192	FG013_05786	FU001_00861	fuGraFG1chr2G196700.1 ; fuGraFG1chr2G196800.1	FGSG_03694	FGRAMPH1_01T13481	.	.	Cluster_4	.	cysk	10	.	.	Non-effector	0.922	Lyase	.	.	.	.
FG001_02433	FG013_06108	FU001_00004	fuGraFG1chr1G324100.1	FGSG_10188	FGRAMPH1_01T07495	Cluster 3	S+Cv	Cluster_1	.	mito	16	.	.	Non-effector	0.99	Peptidase family M1 domain	.	.	.	.
FG001_02457	FG013_06132	FU001_00027	fuGraFG1chr1G326700.1	FGSG_10210	FGRAMPH1_01T07549	Cluster 2	S	.	.	cyto	15	.	.	Unlikely effector	0.521	Dihydrodipicolinate synthetase family	.	.	.	.
FG001_02459	FG013_06134	FU001_00029	fuGraFG1chr1G326900.1	FGSG_10212	FGRAMPH1_01T07553	Cluster 2	S+Cv	Cluster_5	FGSG_10212	.	.	chlo	9	Effector	0.824	Cerato-platanin	.	.	.	.
FG001_02463	FG013_06138	FU001_00033	fuGraFG1chr1G327300.1	FGSG_10216	FGRAMPH1_01T07561	.	.	.	.	cyto	10.5	.	.	Non-effector	0.734	Aldo/keto reductase family	.	.	.	.
FG001_02509	FG013_06182	FU001_00080	FGSG_10255	FGSG_10255	FGRAMPH1_01T07659	Cluster 3	S	.	.	cyto	10	.	.	Effector	0.603	Proteasome subunit	.	.	.	.
FG001_02523	FG013_06196	FU001_00094	fuGraFG1chr1G333300.1	FGSG_10267	FGRAMPH1_01T07687	.	.	.	.	cyto	25	.	.	Non-effector	0.971	Formate--tetrahydrofolate ligase	.	.	.	.
FG001_02524	FG013_06197	FU001_00095	fuGraFG1chr1G333400.1	FGSG_10268	FGRAMPH1_01T07689	Cluster 1	S	.	.	cyto	18	.	.	Non-effector	0.527	WD domain, G-beta repeat	.	.	.	.
FG001_02566	FG013_06239	FU001_00138	fuGraFG1chr1G337100.1	FGSG_10306	FGRAMPH1_01T07781	.	.	Cluster_2	.	mito	19	.	.	Unlikely effector	0.524	SPFH domain / Band 7 family	.	.	.	.
FG001_02573	FG013_06246	FU001_00145	fuGraFG1chr1G337800.1	FGSG_10313	FGRAMPH1_01T07795	.	.	.	.	cyto	12	.	.	Non-effector	0.947	Protein kinase domain	loss of pathogenicity	Fusarium graminearum	Triticum aestivum	10.1111/j.1462-5822.2006.00887.x
FG001_02697	FG013_09671	FU001_00265	fuGraFG1chr1G350300.1	FGSG_10424	FGRAMPH1_01T08071	.	.	.	.	mito	16	.	.	Non-effector	0.957	GHMP kinases N terminal domain	.	.	.	.
FG001_03026	FG013_11706	FU001_09013	fuGraFG1chr2G272600.1	FGSG_04410	FGRAMPH1_01T15221	.	.	.	.	cyto	13.5	.	.	Non-effector	0.688	Proteasome subunit	.	.	.	.
FG001_03134	FG013_08764	FU001_08291	fuGraFG1chr2G262100.1	FGSG_04313	FGRAMPH1_01T14985	Cluster 2	S	Cluster_4	.	cyto_nucl	9.833	.	.	Non-effector	0.955	Alpha amylase, C-terminal all-beta domain	unaffected pathogenicity	Fusarium oxysporum	Galleria mellonella	10.1016/j.fgb.2015.03.014
FG001_03157	FG013_08740	FU001_08267	fuGraFG1chr2G259800.1	FGSG_04290	FGRAMPH1_01T14931	.	.	.	.	nucl	20.5	.	.	Non-effector	0.716	Core histone H2A/H2B/H3/H4	.	.	.	.
FG001_03232	FG013_12129	FU001_08193	fuGraFG1chr2G253000.1	FGSG_04223	FGRAMPH1_01T14773	.	.	.	.	cyto	13	.	.	Non-effector	0.726	Aldo/keto reductase family	.	.	.	.
FG001_03332	FG013_05310	FU001_08686	fuGraFG1chr2G243500.1	FGSG_16145	FGRAMPH1_01T14563	Cluster 6	S+Cv	Cluster_4	.	nucl	11.5	.	.	Non-effector	0.879	DEAD/DEAH box helicase	.	.	.	.
FG001_03338	FG013_05316	FU001_08691	fuGraFG1chr2G243000.1	FGSG_04126	FGRAMPH1_01T14551	Cluster 1	S	.	.	cyto_nucl	9.833	.	.	Non-effector	0.552	Uricase	.	.	.	.
FG001_03347	FG013_05325	FU001_08701	fuGraFG1chr2G242200.1	FGSG_04117	FGRAMPH1_01T14529	.	.	.	.	cyto_nucl	13.833	.	.	Non-effector	0.976	Glutamate/Leucine/Phenylalanine/Valine dehydrogenase	.	.	.	.
FG001_03398	FG013_05377	FU001_08754	fuGraFG1chr2G237400.1	FGSG_04074	FGRAMPH1_01T14407	Cluster 1	S	.	FGSG_04074	.	.	chlo	9	Effector	0.834	.	.	.	.	.
FG001_03491	FG013_05473	FU001_01175	fuGraFG1chr2G227700.1	FGSG_03986	FGRAMPH1_01T14187	.	.	Cluster_5	FGSG_03986	.	.	chlo	6	Non-effector	0.967	Endonuclease/Exonuclease/phosphatase family	.	.	.	.
FG001_03545	FG013_05528	FU001_01120	FGSG_03936	FGSG_03936	FGRAMPH1_01T14071	Cluster 3	Cv	Cluster_2	.	cyto	12.5	.	.	Non-effector	0.736	Aldehyde dehydrogenase family	.	.	.	.
FG001_03568	FG013_05552	FU001_01096	fuGraFG1chr2G220200.1	FGSG_03915	FGRAMPH1_01T14025	.	.	.	.	mito	11	.	.	Non-effector	0.989	Pyridine nucleotide-disulphide oxidoreductase	.	.	.	.
FG001_03825	FG013_00165	FU001_07970	fuGraFG1chr3G077700.1	FGSG_05446	FGRAMPH1_01T17933	Cluster 1	S	Cluster_1	FGSG_05446	.	.	chlo	4	Non-effector	0.875	Arginase family	.	.	.	.
FG001_03835	FG013_00175	.	FGSG_05436	FGSG_05436	FGRAMPH1_01T17911	Cluster 2	Cv	.	.	mito_nucl	12.166	.	.	Non-effector	0.97	Adaptor complexes medium subunit family	.	.	.	.
FG001_03843	FG013_00182	FU001_07988	fuGraFG1chr3G076100.1	FGSG_05430	FGRAMPH1_01T17897	.	.	.	.	cyto	14.5	.	.	Non-effector	0.991	HEAT repeat	.	.	.	.
FG001_03906	FG013_00244	FU001_08052	fuGraFG1chr3G071000.1	FGSG_05374	FGRAMPH1_01T17755	Cluster 4	Cv	.	.	cyto	11	.	.	Non-effector	0.946	GMC oxidoreductase	.	.	.	.
FG001_03916	FG013_00254	FU001_08062	fuGraFG1chr3G070200.1	FGSG_05365	FGRAMPH1_01T17737	.	.	Cluster_3	.	mito	21	.	.	Effector	0.562	Proteasome subunit	.	.	.	.
FG001_03937	FG013_00275	FU001_08085	fuGraFG1chr3G067900.1	FGSG_16473	FGRAMPH1_01T17687	.	.	.	.	mito	13.5	.	.	Non-effector	0.911	Nucleotidyl transferase	.	.	.	.
FG001_03967	FG013_00303	FU001_08113	fuGraFG1chr3G064600.1	FGSG_05322	FGRAMPH1_01T17619	.	.	.	.	cyto	12	.	.	Non-effector	0.99	Acyl transferase domain	reduced virulence	Fusarium graminearum	Triticum aestivum	10.1111/mpp.12250
FG001_03968	FG013_00304	FU001_08115	fuGraFG1chr3G064500.1	FGSG_05321	FGRAMPH1_01T17615	Cluster 2	Cv	.	.	cyto	12.5	.	.	Non-effector	0.956	Beta-ketoacyl synthase, N-terminal domain	.	.	.	.
FG001_04041	FG013_00378	FU001_12176	fuGraFG1chr3G057700.1 ; fuGraFG1chr3G057600.1	FGSG_05252 ; FGSG_05251	FGRAMPH1_01T17465 ; FGRAMPH1_01T17463	Cluster 2	Cv	Cluster_3	.	mito	23	.	.	Non-effector	0.99	Rieske [2Fe-2S] domain	.	.	.	.
FG001_04042	FG013_00379	FU001_12177	fuGraFG1chr3G057500.1	FGSG_05250	FGRAMPH1_01T17461	Cluster 1	S+Cv	.	.	cyto	14.5	.	.	Non-effector	0.987	TCP-1/cpn60 chaperonin family	.	.	.	.
FG001_04043	FG013_00380	FU001_12178	fuGraFG1chr3G057400.1	FGSG_05249	FGRAMPH1_01T17457	Cluster 5	S	.	.	cyto	15	.	.	Non-effector	0.982	Prolyl-tRNA synthetase, C-terminal	.	.	.	.
FG001_04112	FG013_00448	FU001_11649	fuGraFG1chr3G051300.1	FGSG_05187	FGRAMPH1_01T17319	.	.	.	.	cyto	25	.	.	Non-effector	0.879	Adenylosuccinate synthetase	.	.	.	.
FG001_04128	FG013_00466	FU001_11668	fuGraFG1chr3G050100.1	FGSG_05174	FGRAMPH1_01T17277	Cluster 5	S+Cv	.	.	cyto_pero	8.332	.	.	Non-effector	0.94	Ribonucleotide reductase, barrel domain	.	.	.	.
FG001_04223	FG013_00562	FU001_07720	fuGraFG1chr3G041400.1	FGSG_05087	FGRAMPH1_01T17069	.	.	.	.	mito	19.5	.	.	Non-effector	0.808	Thiolase, N-terminal domain	.	.	.	.
FG001_04250	FG013_00589	FU001_07692	fuGraFG1chr3G039100.1	FGSG_05065	FGRAMPH1_01T17005	Cluster 4	S	.	.	cyto	12	.	.	Non-effector	0.621	Eukaryotic translation initiation factor 3 subunit G	.	.	.	.
FG001_04318	FG013_00658	FU001_07628	fuGraFG1chr3G032200.1	FGSG_05003	FGRAMPH1_01T16855	Cluster 3	Cv	.	.	mito	24.5	.	.	Non-effector	0.669	Semialdehyde dehydrogenase, NAD binding domain	.	.	.	.
FG001_04338	FG013_00678	FU001_07611	fuGraFG1chr3G031000.1 ; FGSG_17632	FGSG_17632	FGRAMPH1_01T16813	.	.	.	.	cyto	22	.	.	Non-effector	0.633	NAD dependent epimerase/dehydratase family	.	.	.	.
FG001_04433	FG013_00775	FU001_07947	fuGraFG1chr3G022600.1	FGSG_04902	FGRAMPH1_01T16599	Cluster 4	Cv	.	.	cyto	14	.	.	Non-effector	0.99	Hydantoinase B/oxoprolinase	reduced virulence	Fusarium graminearum	Triticum aestivum	10.1007/s00294-017-0747-y
FG001_04442	FG013_00784	FU001_07937	fuGraFG1chr3G021600.1 ; FGSG_16441 ; fuGraFG1chr3G021700.1	FGSG_16441 ; FGSG_04892 ; FGSG_12649	FGRAMPH1_01T16577 ; FGRAMPH1_01T16579	.	.	Cluster_4	.	cyto	20.5	.	.	Non-effector	0.991	short chain dehydrogenase	.	.	.	.
FG001_04496	FG013_12232	FU001_07888	fuGraFG1chr3G016900.1	FGSG_04848	FGRAMPH1_01T16469	.	.	Cluster_4	FGSG_04848	.	.	cyto	6	Effector	0.759	GDSL-like Lipase/Acylhydrolase family	.	.	.	.
FG001_04512	FG013_02975	FU001_03002	fuGraFG1chr3G202500.1	FGSG_10893	FGRAMPH1_01T20743	.	.	Cluster_3	.	cyto	27	.	.	Non-effector	0.939	Aminotransferase class-V	.	.	.	.
FG001_04529	FG013_02958	FU001_02986	FGSG_10908	FGSG_10908	FGRAMPH1_01T20773	Cluster 3	Cv	Cluster_4	.	cyto	13.5	.	.	Non-effector	0.945	snoRNA binding domain, fibrillarin	.	.	.	.
FG001_04544	FG013_02945	FU001_02971	fuGraFG1chr3G205400.1	FGSG_10920	FGRAMPH1_01T20803	Cluster 1	S+Cv	.	.	cyto	17.5	.	.	Non-effector	0.538	N-terminal domain of oxidoreductase	.	.	.	.
FG001_04552	FG013_02937	FU001_02965	fuGraFG1chr3G206100.1	FGSG_10925	FGRAMPH1_01T20817	Cluster 4	S+Cv	.	.	cyto	20.5	.	.	Non-effector	0.921	Alanine dehydrogenase/PNT, N-terminal domain	.	.	.	.
FG001_04574	FG013_02921	FU001_02951	fuGraFG1chr3G207900.1	FGSG_10940	FGRAMPH1_01T20849	.	.	.	.	cyto	20	.	.	Non-effector	0.87	snoRNA binding domain, fibrillarin	.	.	.	.
FG001_04647	FG013_02836	FU001_02872	fuGraFG1chr3G215300.1	FGSG_13871	FGRAMPH1_01T21035	.	.	.	.	cysk	11	.	.	Non-effector	0.988	Amidase	.	.	.	.
FG001_04856	FG013_08438	FU001_11218	fuGraFG1chr3G234600.1	FGSG_11205	FGRAMPH1_01T21471	Cluster 4	Cv	.	FGSG_11205	.	.	extr	7	Unlikely effector	0.531	Cerato-platanin	.	.	.	.
FG001_04886	FG013_08406	FU001_11247	fuGraFG1chr3G236900.1	FGSG_11228	FGRAMPH1_01T21537	.	.	Cluster_2	FGSG_11228	.	.	chlo	12	Non-effector	0.991	GMC oxidoreductase	.	.	.	.
FG001_05052	FG013_11771	FU001_05667	fuGraFG1chr3G252100.1	FGSG_11366	FGRAMPH1_01T21889	Cluster 4	Cv	.	FGSG_11366	.	.	chlo	6	Non-effector	0.791	Glycosyl hydrolases family 43	overexpressed or secreted during interaction with plant cell walls	Fusarium graminearum	Triticum aestivum	10.1002/pmic.200700184
FG001_05101	FG013_11930	FU001_05611	fuGraFG1chr3G256400.1	FGSG_11411	FGRAMPH1_01T21997	.	.	Cluster_3	.	cyto	19.5	.	.	Non-effector	0.98	Peptidase family M28	.	.	.	.
FG001_05289	FG013_01685	FU001_01714	FGSG_16993	FGSG_16993	FGRAMPH1_01T10541	.	.	Cluster_5	.	nucl	18	.	.	Non-effector	0.809	NAC domain	.	.	.	.
FG001_05303	FG013_01698	FU001_01701	fuGraFG1chr2G068300.1	FGSG_08663	FGRAMPH1_01T10513	.	.	.	.	cyto	12	.	.	Non-effector	0.916	DEAD/DEAH box helicase	.	.	.	.
FG001_05321	FG013_01716	FU001_01680	fuGraFG1chr2G066200.1	FGSG_08644	FGRAMPH1_01T10469	Cluster 2	S	Cluster_4	.	cyto	22.5	.	.	Non-effector	0.93	Hsp70 protein	.	.	.	.
FG001_05345	FG013_01740	FU001_01652	fuGraFG1chr2G063700.1	FGSG_08624	FGRAMPH1_01T10413	.	.	.	.	mito	15	.	.	Effector	0.726	Methyltransferase domain	.	.	.	.
FG001_05349	FG013_01744	FU001_01648	FGSG_08620	FGSG_08620	FGRAMPH1_01T10405	Cluster 5	S	Cluster_5	.	cyto	7.5	.	.	Non-effector	0.702	Cytochrome b5-like Heme/Steroid binding domain	.	.	.	.
FG001_05355	FG013_01750	FU001_01641	fuGraFG1chr2G062500.1	FGSG_08614	FGRAMPH1_01T10387	Cluster 4	S+Cv	.	.	cyto	17	.	.	Non-effector	0.976	tRNA synthetases class I (M)	.	.	.	.
FG001_05369	FG013_01764	FU001_01625	FGSG_08601	FGSG_08601	FGRAMPH1_01T10353	.	.	.	.	cyto	19	.	.	Non-effector	0.989	Phosphoenolpyruvate carboxykinase	.	.	.	.
FG001_05380	FG013_01775	FU001_01617	FGSG_08593	FGSG_08593	FGRAMPH1_01T10335	Cluster 4	Cv	.	.	cyto_nucl	14	.	.	Non-effector	0.654	ATP synthase (E/31 kDa) subunit	.	.	.	.
FG001_05428	FG013_01824	FU001_01569	fuGraFG1chr2G055400.1	FGSG_08548	FGRAMPH1_01T10235	.	.	.	.	mito	22.5	.	.	Non-effector	0.952	Hsp70 protein	.	.	.	.
FG001_05569	FG013_01964	FU001_01425	fuGraFG1chr2G043000.1	FGSG_08426	FGRAMPH1_01T09929	Cluster 6	S+Cv	.	.	mito	21	.	.	Non-effector	0.969	NAT, N-acetyltransferase, of N-acetylglutamate synthase	.	.	.	.
FG001_05631	FG013_02026	FU001_01353	fuGraFG1chr2G036900.1	FGSG_08365	FGRAMPH1_01T09781	Cluster 1	S+Cv	.	.	cyto	13	.	.	Non-effector	0.755	RNA recognition motif. (a.k.a. RRM, RBD, or RNP domain)	.	.	.	.
FG001_05641	FG013_02037	FU001_01341	fuGraFG1chr2G036200.1	FGSG_08358	FGRAMPH1_01T09751	.	.	.	.	cyto	14.5	.	.	Non-effector	0.892	homogentisate 1,2-dioxygenase	.	.	.	.
FG001_05662	FG013_02057	FU001_01320	fuGraFG1chr2G034200.1 ; fuGraFG1chr2G034300.1	FGSG_13389 ; FGSG_13388	FGRAMPH1_01T09699 ; FGRAMPH1_01T09701	.	.	.	.	mito	24	.	.	Non-effector	0.99	Peptidase family M1 domain	.	.	.	.
FG001_05698	FG013_02093	FU001_01284	fuGraFG1chr2G031000.1	FGSG_08310	FGRAMPH1_01T09625	Cluster 2	S+Cv	.	.	cyto	14	.	.	Non-effector	0.918	Cobalamin-independent synthase, Catalytic domain	.	.	.	.
FG001_05750	FG013_02145	FU001_01230	fuGraFG1chr2G026500.1	FGSG_08266	FGRAMPH1_01T09513	Cluster 1	Cv	.	.	cyto	25	.	.	Non-effector	0.971	Acetyl-CoA hydrolase/transferase N-terminal domain	.	.	.	.
FG001_05866	FG013_03851	FU001_10671	fuGraFG1chr1G186500.1	FGSG_01826	FGRAMPH1_01T04419	.	.	.	.	cyto	20.5	.	.	Non-effector	0.956	Aldehyde dehydrogenase family	.	.	.	.
FG001_05901	FG013_03817	FU001_10638	fuGraFG1chr1G189800.1	FGSG_01854	FGRAMPH1_01T04491	.	.	.	.	cyto	11.5	.	.	Non-effector	0.991	HEAT-like repeat	.	.	.	.
FG001_05924	FG013_03796	FU001_08811	FGSG_01870	FGSG_01870	FGRAMPH1_01T04529	.	.	.	.	mito	17	.	.	Non-effector	0.822	Fibrillarin	.	.	.	.
FG001_06002	FG013_03719	FU001_08884	fuGraFG1chr1G198400.1	FGSG_01941	FGRAMPH1_01T04687	Cluster 2	Cv	Cluster_5	.	mito	23	.	.	Non-effector	0.946	ETC complex I subunit conserved region	.	.	.	.
FG001_06025	.	.	.	.	.	Cluster 2	Cv	.	.	nucl	13	.	.	Non-effector	0.664	Peptidase inhibitor I9	.	.	.	.
FG001_06066	FG013_03656	FU001_08636	fuGraFG1chr1G204100.1	FGSG_01993	FGRAMPH1_01T04811	.	.	Cluster_3	FGSG_01993	.	.	chlo	7	Non-effector	0.947	Amidohydrolase family	.	.	.	.
FG001_06103	FG013_08301	FU001_08598	fuGraFG1chr1G207700.1	FGSG_02025	FGRAMPH1_01T04891	Cluster 1	S	.	.	nucl	17.5	.	.	Non-effector	0.988	ABC transporter	.	.	.	.
FG001_06222	FG013_08185	FU001_11353	fuGraFG1chr1G218500.1	FGSG_02131	FGRAMPH1_01T05133	.	.	Cluster_1	.	nucl	15	.	.	Non-effector	0.963	.	.	.	.	.
FG001_06259	FG013_08152	FU001_11382	fuGraFG1chr1G222000.1	FGSG_02160	FGRAMPH1_01T05203	.	.	.	.	cyto	24.5	.	.	Non-effector	0.944	Aldehyde dehydrogenase family	.	.	.	.
FG001_06270	FG013_08142	FU001_11393	fuGraFG1chr1G223100.1	FGSG_02169	FGRAMPH1_01T05227	Cluster 1	S	.	FGSG_02169	.	.	chlo	13	Non-effector	0.905	Zinc carboxypeptidase	.	.	.	.
FG001_06351	FG013_03218	FU001_12242	fuGraFG1chr1G229800.1	FGSG_02233	FGRAMPH1_01T05381	Cluster 6	S+Cv	.	.	cyto	11	.	.	Non-effector	0.991	HEAT-like repeat	.	.	.	.
FG001_06400	FG013_03265	FU001_12289	fuGraFG1chr1G233700.1	FGSG_02267	FGRAMPH1_01T05471	Cluster 1	S	Cluster_3	.	cyto	18	.	.	Non-effector	0.725	short chain dehydrogenase	.	.	.	.
FG001_06478	FG013_03343	FU001_02314	fuGraFG1chr1G240900.1	FGSG_02339	FGRAMPH1_01T05623	Cluster 1	S	.	FGSG_02339	.	.	chlo	9	Non-effector	0.971	Glycosyl hydrolases family 32 N-terminal domain	.	.	.	.
FG001_06537	FG013_11621	FU001_12202	fuGraFG1chr4G176500.1	FGSG_09764	FGRAMPH1_01T26385	.	.	.	.	cyto	20.5	.	.	Non-effector	0.945	GHMP kinases N terminal domain	.	.	.	.
FG001_06544	FG013_11628	FU001_12208	fuGraFG1chr4G177100.1	FGSG_09739	FGRAMPH1_01T26395	Cluster 3	S+Cv	.	.	cyto	12	.	.	Non-effector	0.878	Aminotransferase class I and II	.	.	.	.
FG001_06601	FG013_04237	FU001_07394	FGSG_09689	FGSG_09689	FGRAMPH1_01T26509	Cluster 3	Cv	.	.	cyto	12	.	.	Non-effector	0.99	ThiF family	.	.	.	.
FG001_06717	FG013_04125	FU001_07503	fuGraFG1chr4G193300.1	FGSG_09586	FGRAMPH1_01T26737	Cluster 2	S	.	FGSG_09586	.	.	cyto	3	Unlikely effector	0.547	ML domain	.	.	.	.
FG001_06751	FG013_04094	FU001_07536	fuGraFG1chr4G196100.1	FGSG_09556	FGRAMPH1_01T26803	Cluster 1	Cv	Cluster_3	.	cyto	16.5	.	.	Non-effector	0.878	RNA recognition motif. (a.k.a. RRM, RBD, or RNP domain)	.	.	.	.
FG001_06775	FG013_04069	FU001_10309	fuGraFG1chr4G198600.1	FGSG_09532	FGRAMPH1_01T26863	.	.	.	.	extr	21	.	.	Non-effector	0.913	Inositol monophosphatase family	.	.	.	.
FG001_06850	FG013_03995	.	FGSG_09465	FGSG_09465	FGRAMPH1_01T27019	.	.	.	.	cyto	14	.	.	Non-effector	0.956	TCP-1/cpn60 chaperonin family	.	.	.	.
FG001_06895	FG013_11306	FU001_10196	fuGraFG1chr4G210400.1	FGSG_09429	FGRAMPH1_01T27113	.	.	.	.	mito	22.5	.	.	Non-effector	0.857	NIPSNAP	.	.	.	.
FG001_06907	FG013_11259	FU001_10153	fuGraFG1chr4G211400.1	FGSG_09421	FGRAMPH1_01T27135	Cluster 2	Cv	.	.	mito	19	.	.	Non-effector	0.967	Septin	reduced virulence	Fusarium graminearum	Triticum aestivum	10.1016/j.fgb.2016.07.005
FG001_06974	FG013_10513	FU001_10123	fuGraFG1chr4G217800.1	FGSG_09362	FGRAMPH1_01T27265	Cluster 2	Cv	.	FGSG_09362	.	.	chlo	9	Non-effector	0.969	Thioredoxin	.	.	.	.
FG001_07120	FG013_00044	FU001_09954	fuGraFG1chr3G089900.1	FGSG_05554	FGRAMPH1_01T18195	Cluster 2	S	.	.	mito	22	.	.	Non-effector	0.857	Aminotransferase class-III	reduced virulence	Fusarium graminearum	Triticum aestivum	10.1111/mmi.13203
FG001_07162	FG013_00001	FU001_09912	fuGraFG1chr3G093600.1	FGSG_05593	FGRAMPH1_01T18285	.	.	.	.	nucl	8.5	.	.	Non-effector	0.969	Mycolic acid cyclopropane synthetase	reduced virulence	Fusarium graminearum	Triticum aestivum	10.1128/EC.00255-08
FG001_07186	FG013_12309	FU001_09890	fuGraFG1chr3G095200.1	FGSG_05614	FGRAMPH1_01T18333	Cluster 1	S	.	.	nucl	15.5	.	.	Non-effector	0.682	JAB1/Mov34/MPN/PAD-1 ubiquitin protease	.	.	.	.
FG001_07196	FG013_12319	FU001_09881	fuGraFG1chr3G096300.1	FGSG_05623	FGRAMPH1_01T18355	Cluster 2	S	.	.	mito	24	.	.	Non-effector	0.844	Beta-eliminating lyase	.	.	.	.
FG001_07204	FG013_12327	FU001_09873	fuGraFG1chr3G097200.1	FGSG_05631	FGRAMPH1_01T18373	.	.	.	.	cyto	18	.	.	Effector	0.859	Proteasome subunit	.	.	.	.
FG001_07236	FG013_10670	FU001_10441	fuGraFG1chr3G100700.1	FGSG_05660	FGRAMPH1_01T18445	Cluster 1	Cv	.	.	nucl	15	.	.	Non-effector	0.99	Dynamin family	.	.	.	.
FG001_07332	FG013_01601	FU001_10534	FGSG_05737	FGSG_05737	FGRAMPH1_01T18643	.	.	.	.	nucl	13	.	.	Non-effector	0.566	RNA recognition motif. (a.k.a. RRM, RBD, or RNP domain)	.	.	.	.
FG001_07377	FG013_01555	FU001_02220	FGSG_05778	FGSG_05778	FGRAMPH1_01T18741	.	.	.	.	cyto	20	.	.	Non-effector	0.986	TCP-1/cpn60 chaperonin family	.	.	.	.
FG001_07433	FG013_01501	FU001_02165	fuGraFG1chr3G120000.1	FGSG_05831	FGRAMPH1_01T18861	Cluster 1	S	.	.	cyto	20	.	.	Non-effector	0.962	Aldehyde dehydrogenase family	.	.	.	.
FG001_07450	FG013_01485	FU001_02148	fuGraFG1chr3G121800.1	FGSG_05844	FGRAMPH1_01T18901	Cluster 5	S+Cv	.	.	cyto_mito	8.166	.	.	Non-effector	0.99	Coatomer WD associated region	.	.	.	.
FG001_07528	FG013_01406	FU001_02081	fuGraFG1chr3G129000.1	FGSG_05908	FGRAMPH1_01T19055	.	.	.	.	nucl	21	.	.	Non-effector	0.989	Dynamin family	.	.	.	.
FG001_07595	FG013_01340	FU001_02024	fuGraFG1chr3G135200.1	FGSG_05973	FGRAMPH1_01T19195	Cluster 1	Cv	.	.	extr	13	.	.	Non-effector	0.955	Glycosyl hydrolases family 31	.	.	.	.
FG001_07608	FG013_01327	FU001_02012	fuGraFG1chr3G136400.1	FGSG_05985	FGRAMPH1_01T19225	Cluster 3	Cv	Cluster_4	.	cyto	16.5	.	.	Non-effector	0.983	TCP-1/cpn60 chaperonin family	.	.	.	.
FG001_07639	FG013_01297	FU001_01983	fuGraFG1chr3G139000.1	FGSG_06009	FGRAMPH1_01T19281	Cluster 2	Cv	.	.	cyto	18	.	.	Non-effector	0.989	tRNA synthetases class I (I, L, M and V)	.	.	.	.
FG001_07692	FG013_12280	FU001_12347	FGSG_01236	FGSG_01236	FGRAMPH1_01T03059	Cluster 2	S	.	.	mito	8	.	.	Unlikely effector	0.522	Proteasome subunit	.	.	.	.
FG001_07703	FG013_12269	FU001_12355	fuGraFG1chr1G128600.1	FGSG_01228	FGRAMPH1_01T03041	Cluster 5	S	.	.	cyto_nucl	10.666	.	.	Effector	0.651	.	.	.	.	.
FG001_07716	FG013_12256	FU001_12368	fuGraFG1chr1G127000.1	FGSG_01217	FGRAMPH1_01T03009	.	.	Cluster_2	.	mito	25	.	.	Non-effector	0.99	Carbamoyl-phosphate synthase L chain, ATP binding domain	.	.	.	.
FG001_07735	FG013_12238	FU001_12385	fuGraFG1chr1G125100.1	FGSG_01200	FGRAMPH1_01T02971	.	.	.	.	nucl	9	.	.	Non-effector	0.613	Proteasome subunit	.	.	.	.
FG001_07737	FG013_12236	.	FGSG_01198	FGSG_01198	FGRAMPH1_01T02967	Cluster 4	S	.	.	cyto	13	.	.	Non-effector	0.916	ATPase family associated with various cellular activities (AAA)	lethal	Fusarium graminearum	Triticum aestivum	10.1371/journal.ppat.1002310
FG001_07759	FG013_10884	FU001_06017	fuGraFG1chr1G123000.1	FGSG_01177	FGRAMPH1_01T02925	.	.	.	.	cyto	13.5	.	.	Non-effector	0.819	Cys/Met metabolism PLP-dependent enzyme	.	.	.	.
FG001_07800	FG013_10842	FU001_06056	fuGraFG1chr1G119300.1	FGSG_01141	FGRAMPH1_01T02833	.	.	.	.	mito	22.5	.	.	Non-effector	0.968	Aldehyde dehydrogenase family	.	.	.	.
FG001_07890	FG013_09395	FU001_06144	fuGraFG1chr1G111700.1	FGSG_01059	FGRAMPH1_01T02647	Cluster 4	Cv	.	.	cyto	21	.	.	Non-effector	0.969	FKBP-type peptidyl-prolyl cis-trans isomerase	.	.	.	.
FG001_08059	FG013_11426	FU001_09507	fuGraFG1chr1G094600.1	FGSG_00906	FGRAMPH1_01T02279	.	.	.	.	cyto	17	.	.	Non-effector	0.989	tRNA synthetases class II (A)	.	.	.	.
FG001_08114	FG013_05236	FU001_05272	FGSG_00857	FGSG_00857	FGRAMPH1_01T02145	Cluster 1	S+Cv	.	.	cyto	13.5	.	.	Non-effector	0.955	Pleckstrin homology domain	.	.	.	.
FG001_08145	FG013_05206	FU001_05303	FGSG_00832	FGSG_00832	FGRAMPH1_01T02083	.	.	.	.	cyto	13	.	.	Unlikely effector	0.516	Dienelactone hydrolase family	.	.	.	.
FG001_08181	FG013_11565	FU001_06490	fuGraFG1chr4G161900.1	FGSG_13254	FGRAMPH1_01T26037	.	.	.	.	nucl	8.5	.	.	Non-effector	0.961	HEAT-like repeat	.	.	.	.
FG001_08184	FG013_11562	FU001_06494	fuGraFG1chr4G161600.1	FGSG_07939	FGRAMPH1_01T26031	.	.	Cluster_2	.	mito	10	.	.	Non-effector	0.99	Coatomer WD associated region	.	.	.	.
FG001_08220	FG013_10383	FU001_06527	fuGraFG1chr4G158400.1	FGSG_07908	FGRAMPH1_01T25955	Cluster 2	S+Cv	Cluster_2	.	cyto	15	.	.	Non-effector	0.573	Aldo/keto reductase family	.	.	.	.
FG001_08264	FG013_10338	FU001_06570	fuGraFG1chr4G154000.1	FGSG_07866	FGRAMPH1_01T25857	Cluster 1	S	Cluster_2	FGSG_07866	.	.	chlo	11	Non-effector	0.75	Zinc carboxypeptidase	.	.	.	.
FG001_08416	.	FU001_10753	FGSG_07741	FGSG_07741	FGRAMPH1_01T25539	Cluster 1	S	.	.	nucl	14.5	.	.	Non-effector	0.742	Bacillus thuringiensis toxin	.	.	.	.
FG001_08648	FG013_09920	FU001_07031	fuGraFG1chr4G118300.1	FGSG_07542	FGRAMPH1_01T25059	Cluster 2	S	.	.	cyto	21.5	.	.	Non-effector	0.99	Alpha-L-arabinofuranosidase C-terminal domain	.	.	.	.
FG001_08788	FG013_03447	FU001_02409	fuGraFG1chr1G250100.1	FGSG_02427	FGRAMPH1_01T05829	.	.	.	.	cyto	14.5	.	.	Non-effector	0.584	D-isomer specific 2-hydroxyacid dehydrogenase, NAD binding domain	.	.	.	.
FG001_08794	FG013_03453	FU001_02414	fuGraFG1chr1G250700.1	FGSG_02433	FGRAMPH1_01T05841	.	.	Cluster_2	.	cyto	24	.	.	Non-effector	0.94	Pyridine nucleotide-disulphide oxidoreductase	.	.	.	.
FG001_09104	FG013_07865	FU001_02719	fuGraFG1chr1G279100.1	FGSG_12181	FGRAMPH1_01T06503	Cluster 3	S	.	.	mito	25	.	.	Non-effector	0.59	Cytochrome c oxidase subunit Vb	.	.	.	.
FG001_09110	FG013_07870	FU001_02724	fuGraFG1chr1G279700.1	FGSG_02717	FGRAMPH1_01T06515	.	.	.	.	cysk	16	.	.	Non-effector	0.921	Dehydratase family	.	.	.	.
FG001_09400	FG013_04839	FU001_09859	fuGraFG1chr1G165300.1	FGSG_01605	FGRAMPH1_01T03925	Cluster 4	S+Cv	.	.	cyto_nucl	9	.	.	Non-effector	0.835	ATPase family associated with various cellular activities (AAA)	.	.	.	.
FG001_09433	FG013_04804	FU001_09823	fuGraFG1chr1G162300.1	FGSG_01581	FGRAMPH1_01T03855	.	.	.	.	cyto	14	.	.	Non-effector	0.953	alpha/beta hydrolase fold	.	.	.	.
FG001_09591	FG013_05136	FU001_05368	fuGraFG1chr1G079400.1	FGSG_00767	FGRAMPH1_01T01933	.	.	.	.	cyto	17.5	.	.	Non-effector	0.99	Glycosyl hydrolase family 3 N terminal domain	.	.	.	.
FG001_09634	FG013_05094	FU001_05410	fuGraFG1chr1G075600.1	FGSG_00729	FGRAMPH1_01T01847	Cluster 3	Cv	.	.	nucl	18	.	.	Non-effector	0.722	HMG (high mobility group) box
FG001_09635	FG013_05093	FU001_05412	fuGraFG1chr1G075400.1	FGSG_00728	FGRAMPH1_01T01843	.	.	.	FGSG_00728	.	.	vacu	7	Non-effector	0.969	Heterokaryon incompatibility protein Het-C	.	.	.	.
FG001_09656	FG013_05071	FU001_05434	FGSG_00709	FGSG_00709	FGRAMPH1_01T01795	Cluster 2	S	.	.	cyto	12	.	.	Non-effector	0.646	.	.	.	.	.
FG001_09762	FG013_12558	FU001_03245	fuGraFG1chr1G062000.1	FGSG_00610	FGRAMPH1_01T01549	Cluster 5	S	.	.	cyto_nucl	12.333	.	.	Non-effector	0.751	WD domain, G-beta repeat	.	.	.	.
FG001_09763	FG013_12557	FU001_03246	fuGraFG1chr1G061900.1	FGSG_00609	FGRAMPH1_01T01547	.	.	Cluster_3	.	cyto_nucl	11.5	.	.	Effector	0.812	Endoribonuclease L-PSP	.	.	.	.
FG001_09810	FG013_11815	FU001_03295	FGSG_00564	FGSG_00564	FGRAMPH1_01T01433	Cluster 1	Cv	Cluster_1	.	cyto	20.5	.	.	Non-effector	0.939	Proteasome subunit	.	.	.	.
FG001_09816	FG013_11809	FU001_03303	fuGraFG1chr1G056000.1	FGSG_00558	FGRAMPH1_01T01421	.	.	Cluster_4	.	cyto	17	.	.	Non-effector	0.94	TCP-1/cpn60 chaperonin family	.	.	.	.
FG001_09858	FG013_04280	FU001_11329	fuGraFG1chr4G228000.1	FGSG_09280	FGRAMPH1_01T27481	Cluster 3	Cv	.	.	cyto	18	.	.	Non-effector	0.521	Fructose-1-6-bisphosphatase, N-terminal domain	.	.	.	.
FG001_09870	FG013_04292	FU001_11341	FGSG_09271	FGSG_09271	FGRAMPH1_01T27509	Cluster 2	Cv	.	.	cyto	19.5	.	.	Non-effector	0.801	WD domain, G-beta repeat	.	.	.	.
FG001_09890	FG013_04311	FU001_12882	fuGraFG1chr4G231500.1 ; FGSG_09251	FGSG_09250 ; FGSG_09251	FGRAMPH1_01T27553 ; FGRAMPH1_01T27551	Cluster 4	S	.	.	mito	24.5	.	.	Non-effector	0.991	Respiratory-chain NADH dehydrogenase 51 Kd subunit	.	.	.	.
FG001_10269	FG013_01017	FU001_10908	FGSG_06260	FGSG_06260	FGRAMPH1_01T19889	.	.	.	.	cysk	21	.	.	Non-effector	0.952	TIP49 C-terminus	.	.	.	.
FG001_10312	FG013_01060	FU001_10864	FGSG_06220	FGSG_06220	FGRAMPH1_01T19791	Cluster 2	Cv	.	.	cyto_nucl	12.5	.	.	Non-effector	0.844	Eukaryotic translation initiation factor 2 alpha subunit	unaffected pathogenicity	Fusarium graminearum	Triticum aestivum	10.1371/journal.ppat.1002310
FG001_10385	FG013_01132	FU001_01820	FGSG_06159	FGSG_06159	FGRAMPH1_01T19633	.	.	.	.	mito	10	.	.	Non-effector	0.8	Proteasome subunit	.	.	.	.
FG001_10452	FG013_01197	FU001_01887	fuGraFG1chr3G148900.1	FGSG_16604	FGRAMPH1_01T19491	Cluster 3	Cv	.	.	cyto	11.5	.	.	Non-effector	0.955	Calcineurin-like phosphoesterase	.	.	.	.
FG001_10512	FG013_01253	FU001_01941	fuGraFG1chr3G143000.1	FGSG_06051	FGRAMPH1_01T19369	Cluster 2	S	Cluster_5	.	cyto_nucl	9.333	.	.	Non-effector	0.991	Glycosyltransferase family 20	reduced virulence	Beauveria bassiana	Galleria mellonella	10.1007/s00253-017-8155-2
FG001_10531	FG013_01270	FU001_01957	fuGraFG1chr3G141400.1	FGSG_06035	FGRAMPH1_01T19335	.	.	.	.	nucl	15	.	.	Non-effector	0.666	Septin	unaffected pathogenicity	Fusarium graminearum	Triticum aestivum	10.1016/j.fgb.2016.07.005
FG001_10586	FG013_12908	FU001_11812	fuGraFG1chr2G079000.1	FGSG_08761	FGRAMPH1_01T10757	.	.	Cluster_3	.	nucl	16	.	.	Non-effector	0.969	tRNA synthetases class II (D, K and N)	unaffected pathogenicity	Fusarium graminearum	Triticum aestivum	10.1371/journal.ppat.1002310
FG001_10682	FG013_07417	FU001_10219	fuGraFG1chr2G088300.1	FGSG_08840	FGRAMPH1_01T10967	Cluster 3	Cv	Cluster_4	.	cyto	16	.	.	Non-effector	0.99	Adaptin N terminal region	.	.	.	.
FG001_10721	FG013_07445	FU001_12768	fuGraFG1chr2G090600.1	FGSG_08865	FGRAMPH1_01T11029	.	.	.	.	cyto	15	.	.	Non-effector	0.989	tRNA synthetases class II (D, K and N)	unaffected pathogenicity	Fusarium graminearum	Triticum aestivum	10.1371/journal.ppat.1002310
FG001_10735	FG013_07458	FU001_12756	fuGraFG1chr2G092000.1	FGSG_08875	FGRAMPH1_01T11061	.	.	.	.	cyto	16	.	.	Non-effector	0.956	ATP-sulfurylase	.	.	.	.
FG001_10776	FG013_07500	FU001_12627	fuGraFG1chr2G096300.1	FGSG_16946	FGRAMPH1_01T11155	Cluster 3	S+Cv	.	.	mito	6	.	.	Non-effector	0.961	Importin-beta N-terminal domain	.	.	.	.
FG001_10819	FG013_07542	FU001_12019	fuGraFG1chr2G100000.1	FGSG_08943	FGRAMPH1_01T11245	.	.	Cluster_1	.	cyto	13	.	.	Effector	0.572	Enoyl-(Acyl carrier protein) reductase	.	.	.	.
FG001_10823	FG013_07546	FU001_12015	fuGraFG1chr2G100300.1	FGSG_08946	FGRAMPH1_01T11251	Cluster 1	Cv	.	.	cyto	16.5	.	.	Non-effector	0.962	Glycosyl hydrolases family 43	.	.	.	.
FG001_11032	FG013_08900	FU001_06312	fuGraFG1chr2G290900.1	FGSG_04596	FGRAMPH1_01T15663	.	.	.	.	cyto	13	.	.	Non-effector	0.862	O-methyltransferase	.	.	.	.
FG001_11169	FG013_02419 ; FG013_02417	FU001_03845	fuGraFG1chr1G024200.1 ; FGSG_00236	FGSG_00237 ; FGSG_00236	FGRAMPH1_01T00633 ; FGRAMPH1_01T00631	Cluster 3	Cv	.	.	cyto	8	.	.	Non-effector	0.99	Transferase family	.	.	.	.
FG001_11331	FG013_02577	FU001_03498	FGSG_00376	FGSG_00376	FGRAMPH1_01T00991	.	.	Cluster_4	.	mito	24	.	.	Non-effector	0.971	Respiratory-chain NADH dehydrogenase, 49 Kd subunit	reduced virulence	Fusarium graminearum	Triticum aestivum	10.1094/PHYTO-95-0744
FG001_11494	FG013_09134	FU001_04454	fuGraFG1chr2G010600.1	FGSG_08083	FGRAMPH1_01T09075	Cluster 1	S+Cv	Cluster_3	.	cyto	9.5	.	.	Non-effector	0.934	Pyridoxal-dependent decarboxylase conserved domain	.	.	.	.
FG001_11530	FG013_09167	FU001_04422	fuGraFG1chr2G007300.1	FGSG_08049	FGRAMPH1_01T08997	.	.	.	.	cyto_nucl	10	.	.	Non-effector	0.613	ChrR Cupin-like domain	.	.	.	.
FG001_11570	FG013_12450	FU001_04385	fuGraFG1chr2G003900.1	FGSG_08012	FGRAMPH1_01T08909	.	.	.	FGSG_08012	.	.	chlo	11	Non-effector	0.826	Subtilase family	.	.	.	.
FG001_11736	FG013_09255	FU001_05102	FGSG_01369	FGSG_01369	FGRAMPH1_01T03379	Cluster 3	S	.	.	nucl	13.5	.	.	Non-effector	0.907	WD domain, G-beta repeat	.	.	.	.
FG001_11774	FG013_06911	FU001_11966	FGSG_09966	FGSG_09966	FGRAMPH1_01T06943	.	.	.	.	nucl	16.5	.	.	Non-effector	0.711	Domain found in IF2B/IF5	.	.	.	.
FG001_11817	FG013_06953	FU001_11034	fuGraFG1chr1G295100.1	FGSG_09927	FGRAMPH1_01T06853	.	.	.	.	cyto_nucl	12.5	.	.	Non-effector	0.99	Tetratricopeptide repeat	.	.	.	.
FG001_12213	FG013_09204	FU001_05051	fuGraFG1chr1G146700.1	FGSG_01421	FGRAMPH1_01T03495	.	.	Cluster_5	.	mito	12	.	.	Non-effector	0.666	Mitochondrial carrier protein	reduced virulence	Fusarium oxysporum	Solanum lycopersicum	10.1105/tpc.002576
FG001_12244	FG013_09234	FU001_05083	fuGraFG1chr1G143900.1	FGSG_01392	FGRAMPH1_01T03423	.	.	Cluster_4	.	cyto	18	.	.	Non-effector	0.712	Isocitrate/isopropylmalate dehydrogenase	.	.	.	.
FG001_12286	FG013_02709	FU001_03366	fuGraFG1chr1G050400.1	FGSG_00500	FGRAMPH1_01T01281	Cluster 5	S	.	.	cyto	17.5	.	.	Non-effector	0.989	Hexokinase	reduced virulence	Fusarium graminearum	Triticum aestivum	10.1111/mpp.12258
FG001_12404	FG013_00869	FU001_11092	fuGraFG1chr3G180200.1	FGSG_06397	FGRAMPH1_01T20207	.	.	Cluster_4	FGSG_06397	.	.	chlo	10	Non-effector	0.733	Glycosyl hydrolase family 61	.	.	.	.
FG001_12416	FG013_00880	FU001_11104	fuGraFG1chr3G179000.1	FGSG_06385	FGRAMPH1_01T20181	.	.	.	.	nucl	19	.	.	Non-effector	0.838	Protein kinase domain	loss of pathogenicity	Fusarium graminearum	Triticum aestivum	10.1111/j.1469-8137.2007.02333.x
FG001_12469	FG013_00930	.	fuGraFG1chr3G174400.1	FGSG_06337	FGRAMPH1_01T20067	Cluster 2	S	Cluster_5	.	mito	15	.	.	Effector	0.795	Tim17/Tim22/Tim23/Pmp24 family	.	.	.	.
FG001_12669	FG013_03148	FU001_03167	fuGraFG1chr3G186100.1	FGSG_10743	FGRAMPH1_01T20351	.	.	.	.	mito	15	.	.	Non-effector	0.989	Tryptophan synthase alpha chain	.	.	.	.
FG001_12675	FG013_03153	FU001_03172	fuGraFG1chr3G185500.1	FGSG_10738	FGRAMPH1_01T20337	.	.	.	.	cyto	10.5	.	.	Non-effector	0.758	Maintenance of mitochondrial structure and function	.	.	.	.
FG001_12709	FG013_10482	FU001_10016	FGSG_09786	FGSG_09786	FGRAMPH1_01T26277	.	.	.	.	cyto	9	.	.	Non-effector	0.97	FAD binding domain	.	.	.	.
FG001_12863	.	.	FGSG_12918	FGSG_12918	FGRAMPH1_01T22261	.	.	.	FGSG_12918	.	.	extr	11	Non-effector	0.987	LysM domain	.	.	.	.
FG001_12939	FG013_00957	FU001_10962	fuGraFG1chr3G172100.1	FGSG_06313	FGRAMPH1_01T20013	.	.	.	.	cyto_mito	12.166	.	.	Non-effector	0.953	TCP-1/cpn60 chaperonin family	.	.	.	.
FG001_12957	FG013_00939	FU001_12856	fuGraFG1chr3G173500.1	FGSG_06328	FGRAMPH1_01T20049	Cluster 3	S	.	.	pero	10.5	.	.	Non-effector	0.99	XFP N-terminal domain	.	.	.	.
FG001_12975	FG013_00128	FU001_12420	fuGraFG1chr3G081600.1	FGSG_12745	FGRAMPH1_01T18017	Cluster 6	S+Cv	.	.	cyto	15	.	.	Non-effector	0.99	AAA domain (Cdc48 subfamily)	.	.	.	.
FG001_13071	FG013_07021	FU001_10968	fuGraFG1chr1G288300.1	FGSG_09862	FGRAMPH1_01T06705	.	.	.	.	nucl	13.5	.	.	Non-effector	0.973	Calponin homology (CH) domain	reduced virulence	Fusarium graminearum	Triticum aestivum	10.1111/mpp.12108
FG001_13095	FG013_11598	FU001_06458	FGSG_07970	FGSG_07970	FGRAMPH1_01T26105	Cluster 3	Cv	Cluster_3	.	mito	27	.	.	Non-effector	0.835	2-oxoacid dehydrogenases acyltransferase (catalytic domain)	.	.	.	.
FG001_13146	.	.	.	.	.	.	.	.	.	cyto_nucl	15	.	.	Non-effector	0.914	Cytochrome C oxidase subunit II, periplasmic domain	.	.	.	.
.	FG013_01600	FU001_10535	FGSG_05738	FGSG_05738	FGRAMPH1_01T18645	Cluster 6	S+Cv	.	.	cyto	17	.	.	Non-effector	0.588	TatD related DNase	.	.	.	.
FG001_12772 ; FG001_12771	FG013_10424	FU001_10070	FGSG_17280	FGSG_17280	FGRAMPH1_01T26155	.	.	.	.	mito	13	.	.	Non-effector	0.836	RNA recognition motif. (a.k.a. RRM, RBD, or RNP domain)	.	.	.	.
.	FG013_11583	FU001_06472	fuGraFG1chr4G163500.1 ; fuGraFG1chr4G163600.1	FGSG_13257 ; FGSG_13258	FGRAMPH1_01T26073 ; FGRAMPH1_01T26075	Cluster 2	S	.	.	mito	20	.	.	Non-effector	0.99	NmrA-like family	.	.	.	.
FG001_03264	FG013_12160	FU001_08163	.	FGSG_04194	FGRAMPH1_01T14705	.	.	.	.	mito	18.5	.	.	Non-effector	0.982	Aldehyde dehydrogenase family	.	.	.	.
FG001_07453	FG013_01482	FU001_02145	fuGraFG1chr3G122100.1	FGSG_05847	FGRAMPH1_01T18907	Cluster 2	SxCv	.	FGSG_05847	.	.	chlo	6	Unlikely effector	0.535	Polysaccharide deacetylase	.	.	.	.
.	FG013_03002	FU001_03025	FGSG_10873	FGSG_10873	FGRAMPH1_01T20681	Cluster 3	S	.	.	cyto_nucl	11.833	.	.	Effector	0.793	Ras family	.	.	.	.
FG001_08318	FG013_10284	FU001_06620	fuGraFG1chr4G149400.1	FGSG_07822	FGRAMPH1_01T25755	Cluster 1	S	.	.	cyto	18	.	.	Effector	0.62	.	.	.	.	.
FG001_07274	FG013_10636	FU001_10477	fuGraFG1chr3G104100.1	FGSG_05689	FGRAMPH1_01T18519	.	.	.	.	cyto	15	.	.	Non-effector	0.668	NAD dependent epimerase/dehydratase family	.	.	.	.
FG001_06220	FG013_08187	FU001_08497	fuGraFG1chr1G218300.1	FGSG_15936	FGRAMPH1_01T05129	.	.	.	.	cyto	9.5	.	.	Non-effector	0.991	Ankyrin repeats (3 copies)	.	.	.	.
FG001_09448	FG013_04789	FU001_09806	fuGraFG1chr1G160900.1	FGSG_15861	FGRAMPH1_01T03817	Cluster 5	S+Cv	.	.	mito	15	.	.	Non-effector	0.954	Ubiquitin elongating factor core	.	.	.	.
FG001_07868	FG013_09418	FU001_06123	fuGraFG1chr1G113900.1	FGSG_15824	FGRAMPH1_01T02695	.	.	.	.	mito	24.5	.	.	Non-effector	0.966	ATP synthase alpha/beta family, nucleotide-binding domain	.	.	.	.
FG001_03450	FG013_05429	FU001_01214	fuGraFG1chr2G232300.1	FGSG_04028	FGRAMPH1_01T14289	.	.	.	.	nucl	17.5	.	.	Non-effector	0.948	DEAD/DEAH box helicase	.	.	.	.
FG001_06385	FG013_03249	FU001_12273	fuGraFG1chr1G232200.1	FGSG_02255	FGRAMPH1_01T05437	Cluster 2	Cv	.	FGSG_02255	.	.	extr	9	Effector	0.804	LysM domain	.	.	.	.
FG001_11566	FG013_12447	FU001_04388	fuGraFG1chr2G004200.1	FGSG_08015	FGRAMPH1_01T08915	Cluster 4	S+Cv	.	FGSG_08015	.	.	extr	8	Effector	0.662	.	.	.	.	.
FG001_06458	FG013_03324	FU001_02295	fuGraFG1chr1G239000.1	FGSG_02320	FGRAMPH1_01T05585	.	.	.	.	nucl	25	.	.	Non-effector	0.817	Fungal Zn(2)-Cys(6) binuclear cluster domain	unaffected pathogenicity	Fusarium graminearum	Triticum aestivum	10.1371/journal.ppat.1002310
.	FG013_02263	FU001_03699	.	.	.	Cluster 4	S+Cv	.	.	cyto	14	.	.	Non-effector	0.863	.	.	.	.	.
FG001_03398	FG013_05377	FU001_08754	fuGraFG1chr2G237400.1	FGSG_04074	FGRAMPH1_01T14407	.	.	.	FGSG_04074	.	.	chlo	9	Effector	0.856	.	.	.	.	.
FG001_03491	FG013_05473	FU001_01175	fuGraFG1chr2G227700.1	FGSG_03986	FGRAMPH1_01T14187	.	.	Cluster_5	FGSG_03986	.	.	chlo	6	Non-effector	0.983	Endonuclease/Exonuclease/phosphatase family	.	.	.	.
FG001_03644	FG013_05967	FU001_01022	fuGraFG1chr2G214300.1	FGSG_12369	FGRAMPH1_01T13859	.	.	.	FGSG_12369	.	.	chlo	10	Non-effector	0.956	Peroxidase	.	.	.	.
FG001_00091	FG013_08546	FU001_04915	fuGraFG1chr4G103900.1	FGSG_07401	FGRAMPH1_01T24731	.	.	.	.	cyto	15	.	.	Non-effector	0.815	Elongation factor 1 gamma, conserved domain	.	.	.	.
FG001_11494	FG013_09134	FU001_04454	fuGraFG1chr2G010600.1	FGSG_08083	FGRAMPH1_01T09075	Cluster 3	S	Cluster_3	.	cyto	9.5	.	.	Non-effector	0.931	Pyridoxal-dependent decarboxylase conserved domain	.	.	.	.
FG001_02697	FG013_09671	FU001_00265	fuGraFG1chr1G350300.1	FGSG_10424	FGRAMPH1_01T08071	.	.	.	.	mito	16	.	.	Non-effector	0.958	GHMP kinases N terminal domain	.	.	.	.
FG001_11570	FG013_12450	FU001_04385	fuGraFG1chr2G003900.1	FGSG_08012	FGRAMPH1_01T08909	.	.	.	FGSG_08012	.	.	chlo	11	Non-effector	0.826	Subtilase family	.	.	.	.
FG001_04356	FG013_00696	FU001_07593	fuGraFG1chr3G029400.1	FGSG_16446	FGRAMPH1_01T16779	.	.	.	.	nucl	19	.	.	Non-effector	0.99	Zinc finger, C2H2 type	.	.	.	.
aMDC_Fg1 accessions of identified proteins (Best hit; p-value <1E-50; Identity >80%). Dot indicate that no corresponding protein were found according to the p-value fixed. bAccessions of the corresponding proteins in MDC_Fg13 determined using BLAST (Best hit; p-value <1E-50; Identity >80%). Dot indicate that no corresponding protein were found according to the p-value fixed. cAccessions of the co…
